# Supplementary material
Source: Royal Society of Chemistry journal article supplement (doi:10.1039/d6mh00019c)
Supplement: d6mh00019c1.pdf [file d6mh00019c1.pdf]

Electronic  
Supplementary Information  
for  
**Potassium Trinitromethyl  
Tetrazole (TNMT-K): A New  
Member of the Primary  
Explosive Family**

Sohan Lal<sup>a</sup>, Richard J. Staples<sup>b</sup>, Jean'ne M. Shreeve<sup>a\*</sup>

<sup>a</sup>Department of Chemistry, University of Idaho, Moscow,  
Idaho 83844-2343

<sup>b</sup>Department of Chemistry, Michigan State University, East  
Lansing, Michigan 48824

To whom correspondence should be addressed. E-mail:  
[jshreeve@uidaho.edu](mailto:jshreeve@uidaho.edu).

| Entry | Table of Contents |                                                                                                                                                                      | Page No  |
|-------|-------------------|----------------------------------------------------------------------------------------------------------------------------------------------------------------------|----------|
| 1     | Table S1.         | Calculated Total Energy ( $E_0$ ), Zero-point Energy (ZPE), values of Thermal Correction ( $H_T$ ) and Enthalpy of Formation ( $\Delta H_f^\circ$ (g)) of the TNMT-K | S3       |
| 2     | Figure S1         | Isodesmic reaction for TNMT-K                                                                                                                                        | S3       |
| 3     | Scheme S1         | Born–Haber cycle for the formation of salts.                                                                                                                         | S3       |
| 4     |                   | Experimental section                                                                                                                                                 | S4-S6    |
| 5     | Figure S2         | Molecular unit of TNMT-K (thermal ellipsoid at 50%)                                                                                                                  | S6       |
| 6     | Table S2          | Single crystal X-ray data and structure refinement for TNMT-K                                                                                                        | S7       |
| 7     | Figures S3-5      | Packing diagrams of TNMT-K                                                                                                                                           | S8-S9    |
| 8     | Tables S3-7       | Single crystal X-ray data of TNMT-K                                                                                                                                  | S9-S15   |
| 9     | Figures S6-16     | FTIR-Spectrum of TAA, TNMT and TNMT-K                                                                                                                                | S15-S-20 |
| 10    | Figures S17-S22   | NMR spectrum of TAA, TNMT and TNMT-K                                                                                                                                 | S21-S23  |
| 11    | Figures S23-S29   | DSC and TGA plots of TAA, TNMT and TNMT-K                                                                                                                            | S24-S27  |
| 12    | Figures S30-S34   | Stability test                                                                                                                                                       | S27-S30  |
| 13    | Figure S35        | Hot-needle test for TAA                                                                                                                                              | S31      |
| 14    | Figure S36        | Hot-plate test for TAA                                                                                                                                               | S31      |
| 15    | Figure S37        | Laser irradiation test                                                                                                                                               | S31      |
| 16    | Tables S8         | Detonation parameters of TNMT-K                                                                                                                                      | S32      |
| 17    | Table S9          | Concentration of detonation products of TNMT-K                                                                                                                       | S32      |
| 18    | Table S10         | Thermodynamic properties of combustion products of TNMT-K                                                                                                            | S33      |
| 19    | Table S11         | Performance parameters of TNMT-K                                                                                                                                     | S33      |
| 20    | Table S12         | Concentration of combustion products (mol/kg of explosive) of TNMT-K.                                                                                                | S34      |
| 21    |                   | References                                                                                                                                                           | S34      |

**Table S1.** Computed Zero-Point Energies (ZPE), Thermal Correction ( $H_T$ ), Total Energies ( $E_0$ ), and enthalpy of formation of compound **5**.

| Compound                        | $E_0$ (a.u)  | ZPE (a.u) | $H_T$ (a.u) | $\Delta H_f^\circ$ (g)<br>kJ/mol | $\Delta H_L$<br>kJ/mol | $\Delta H_f^\circ$ (s)<br>kJ/mol |
|---------------------------------|--------------|-----------|-------------|----------------------------------|------------------------|----------------------------------|
| TNMT-K                          |              |           |             | 644.80 <sup>a</sup>              | 497.98 <sup>b</sup>    | 146.82                           |
| TNMT-A                          | -908.641357  | 0.067357  | 0.013309    | 143.71 <sup>a</sup>              | ----                   | ----                             |
| MT-A                            | -296.8592355 | 0.074564  | 0.006140    | 142.81 <sup>c</sup>              | ----                   | ----                             |
| CH <sub>4</sub>                 | -40.3796224  | 0.044793  | 0.003812    | -74.60 <sup>c</sup>              | ----                   | ----                             |
| CH <sub>3</sub> NO <sub>2</sub> | -244.4784821 | 0.049840  | 0.005298    | -74.30 <sup>c</sup>              | ----                   | ----                             |

<sup>a</sup>Calculated using isodesmic equation as shown in Fig. S1 and Scheme S1. <sup>c</sup>Calculated using equation S2. <sup>c</sup>Obtained at G2 level.

The gas-phase enthalpy of formation  $\Delta_f H^\circ(g)$  was predicted using Gaussian 03 program<sup>1</sup> according to isodesmic equation as shown in Figure S1.

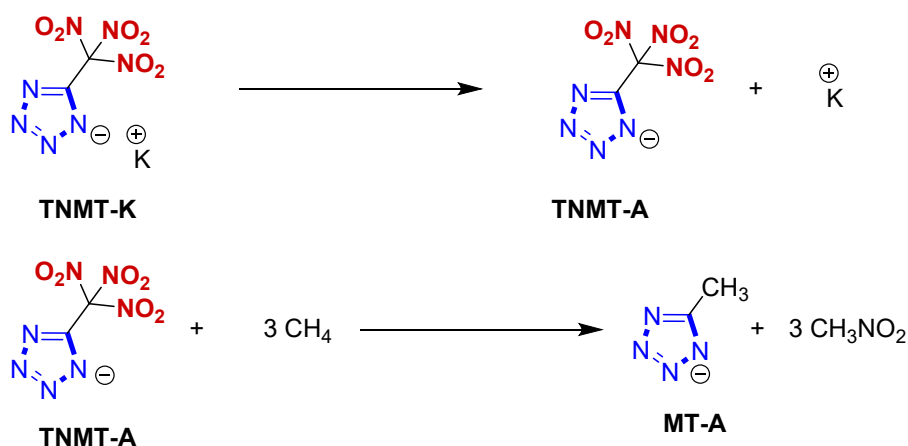

**Fig. S1:** Isodesmic reaction for TNMT-K.

Then, the solid-phase heat of formation was obtained using a Born-Haber energy cycle.<sup>2-4</sup>

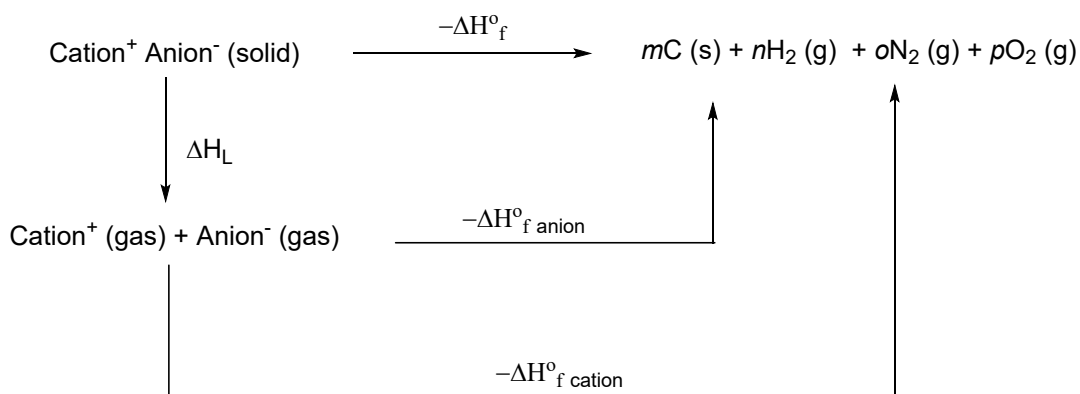

**Scheme S1.** Born-Haber cycle for the formation of salts.

$$\Delta H_f^\circ (\text{ionic salt, 298 K}) = \Delta H_f^\circ (\text{cation, 298 K}) + \Delta H_f^\circ (\text{anion, 298 K}) - \Delta H_L \quad \dots(\text{S1})$$

$$\Delta H_L = U_{\text{POT}} + [\rho(nM/2 - 2) + q(nX/2 - 2)]RT \quad \dots(\text{S2})$$

$$U_{\text{POT}} = \gamma(\rho m/Mm) + \delta \quad \dots(\text{S3})$$

Where, ( $U_{\text{POT}}$ ), is lattice potential energies, ( $\Delta H_L$ ) is lattice enthalpies,  $\rho$  is the density ( $\text{g}/\text{cm}^3$ ),  $nM$  and  $nX$  depend on the nature of the ions  $Mp^+$  and  $Xq^-$ , respectively, and for monoatomic ions are equal to three.  $Mm$  is the chemical formula mass of the ionic material ( $\text{g}$ ), and the coefficients  $\gamma$  (in  $\text{kJmol}^{-1}\text{cm}$ ) and  $\delta$  (in  $\text{kJmol}^{-1}$ ) are given in the literature.<sup>2-4</sup> The detonation and propulsive properties were calculated by using the EXPLO5 7.01 program.<sup>5</sup>

## EXPERIMENTAL SECTION

### General Methods

All reagents and solvents were used as received unless otherwise specified (AKSci, Sigma-Aldrich, Acros Organics, VWR). The densities of the new compounds were obtained at 25 °C with a Micromeritics Accupyc II 1340 gas pycnometer. The thermal stability (melting and decomposition points) was measured by heating individual samples from 30 °C to 400 °C at two heating rates of 5 °C  $\text{min}^{-1}$  and 10 °C  $\text{min}^{-1}$  on a Differential Scanning Calorimeter (DSC, TA Instruments Company, Model: Q2000). The FTIR spectra were recorded with KBr plates on a Thermo Nicolet AVATAR 370 spectrometer.  $^1\text{H}$  and  $^{13}\text{C}$  NMR spectra were recorded on a 500 MHz (Bruker) nuclear magnetic resonance spectrometer operating at 500.19 and 125.77 MHz, respectively, using DMSO- $d_6$  as the solvent and tetramethylsilane as the external standard locking solvent. Elemental analyses (C, H, N) were performed using a Vario Micro Cube Elemental Analyser. The friction sensitivities (FS) and impact sensitivities (IS) were measured with a standard BAM friction tester and BAM drop hammer. Crystals of TNMT-K were mounted on a nylon loop with Paratone oil on an XtaLAB Synergy, Dualflex, HyPix diffractometer at 100 K. The structures were solved with the ShelXT solution program using dual methods and Olex2.<sup>6</sup> The model was refined with ShelXL using full matrix least squares minimization on F2.<sup>7-9</sup>

### Caution!

The compound studied in the present work is potentially a high-energy material. It is strongly recommended that it be synthesized and handled with extreme care, following all standard safety precautions. Compounds **1** and **2** were prepared according to the reported procedure.<sup>10-</sup>

11.

*1H-Tetrazole-5-acetic acid (1, TAA)*. A mixture of cyanoacetic acid (10.0 g, 117.56 mmol), sodium azide (11.462 g, 176.34 mmol), and ZnCl<sub>2</sub> (16.023 g, 117.56 mmol) in isopropanol (150 mL) and water (150 mL) was heated at 90°C for 24 h. After 24 hours, a white precipitate formed in the reaction mixture. Then, it was cooled, and 10% HCl was added drop-wise until the reaction mixture became a clear solution. Subsequently, the reaction mixture was diluted with ethyl acetate (200 mL) and extracted with excess ethyl acetate (4 × 100 mL), dried over anhydrous Na<sub>2</sub>SO<sub>4</sub>, and concentrated in vacuo. The crude residue was purified by triturating with chloroform and ethyl acetate to afford pure 2-(2H-tetrazol-5-yl)-acetic acid (TAA, **1**). Crystalline, colorless solid; Yield: 10.80 g, 72%, DSC (5 °C min<sup>-1</sup>): T<sub>m</sub> (onset) = 172.97 °C (melting). IR (KBr pellet)  $\tilde{\nu}$  3013 (m), 2970 (m), 2936 (m), 2705 (m), 2598 (m), 1732 (s), 1560 (m), 1548 (m), 1440 (m), 1423 (m), 1379 (m), 1350 (w), 1311 (m), 1260 (m), 1193 (s), 1097 (m), 1059 (s), 1013 (m), 945 (s), 854 (s), 782 (m), 659 (s) cm<sup>-1</sup>; <sup>1</sup>H NMR (14.99 MHz, DMSO-d<sub>6</sub>):  $\delta$  4.08 (s, 2H); <sup>13</sup>C NMR (60.0 MHz, DMSO-d<sub>6</sub>):  $\delta$  169.58, 151.07, 30.05.

*5-(Trinitromethyl)-2H-tetrazole (2, TNMT)*. Compound **1** (5.0 g, 39.04 mmol) was slowly added to a cooled and well-stirred mixture of 98% sulfuric acid (35 mL) and freshly distilled 100% nitric acid (30 mL) at 0 °C. The temperature was slowly elevated to room temperature, and the mixture was then stirred at room temperature for 24 h. Then, the resulting light-yellow solution was carefully poured onto crushed ice (200 g), and the resulting mixture was extracted with dichloromethane (5 × 200 mL). The combined organic phases were dried over anhydrous Na<sub>2</sub>SO<sub>4</sub>, filtered, and the solvent was removed under vacuum at ambient temperature (**caution**: TNMT should be handled with extreme care because it has a low decomposition temperature). Initially, a yellow oil was obtained that solidified with petroleum ether, and 5-(trinitromethyl)-2H-tetrazole (**2, TNMT**) was obtained as a pale-yellow solid. Crystalline, pale-yellow solid; Yield: 5.818 g, 68%, DSC (5 °C min<sup>-1</sup>): T<sub>d</sub> (onset) = 88.43°C (decomposition). IR (KBr pellet)  $\tilde{\nu}$  3037 (m), 2921 (m), 2875 (m), 1599 (s), 1488 (m), 1453 (m), 1435 (m), 1330 (m), 1309 (m), 1276 (s), 1253 (m), 1236 (s), 1188 (s), 1131 (m), 1101 (m), 1041 (m), 1031 (m), 983 (m), 862 (m), 840 (m), 794 (s), 741 (s), 696 (m), 679 (m), 636 (m), 619 (m) cm<sup>-1</sup>; <sup>1</sup>H NMR (60.0 MHz, Acetone-d<sub>6</sub>):  $\delta$  11.29 (s, 1H); <sup>13</sup>C NMR (15.01 MHz, DMSO-d<sub>6</sub>):  $\delta$  152.47, 121.87.

*Potassium-5-(trinitromethyl)tetrazol-1-ide (TNMT-K)*. Compound **2** (2.190 g, 10.0 mmol) was dissolved in methanol (20 mL) at 0°C, and then KI (1.910 g, 11.5 mmol, 1.15 equiv.) was added portionwise with extra care and the resulting mixture was stirred for 10 h at room temperature. Then, the reaction mixture was filtered off. The white solid residue was further triturated with n-hexane and dried to give pure TNMT-K in quantitative yield. Crystalline, yellow solid; Yield:

2.54 g, 99%, DSC (5 °C min<sup>-1</sup>): T<sub>d</sub> (onset) = 118 °C (decomposition). IR (KBr pellet)  $\tilde{\nu}$  1621 (m), 1601 (s), 1580 (s), 1524 (m), 1438 (m), 1366 (m), 1284 (m), 1219 (s), 1185 (s), 1155 (s), 1107 (s), 1033 (s), 1017 (m), 989 (m), 846 (s), 825 (m), 802 (s), 748 (m), 737 (m), 681 (m), 636 (m), 615 (s) cm<sup>-1</sup>; <sup>1</sup>H NMR (60.0 MHz, DMSO-d<sub>6</sub>):  $\delta$  no peaks; <sup>13</sup>C NMR (15.01 MHz, DMSO-d<sub>6</sub>):  $\delta$  150.04, 102.50; Elemental analysis: calcd (%) for C<sub>2</sub>KN<sub>7</sub>O<sub>6</sub> (257.16): C, 9.34, H, 0.00, N, 38.13. Found C, 9.43; H, 0.146; N, 37.92.

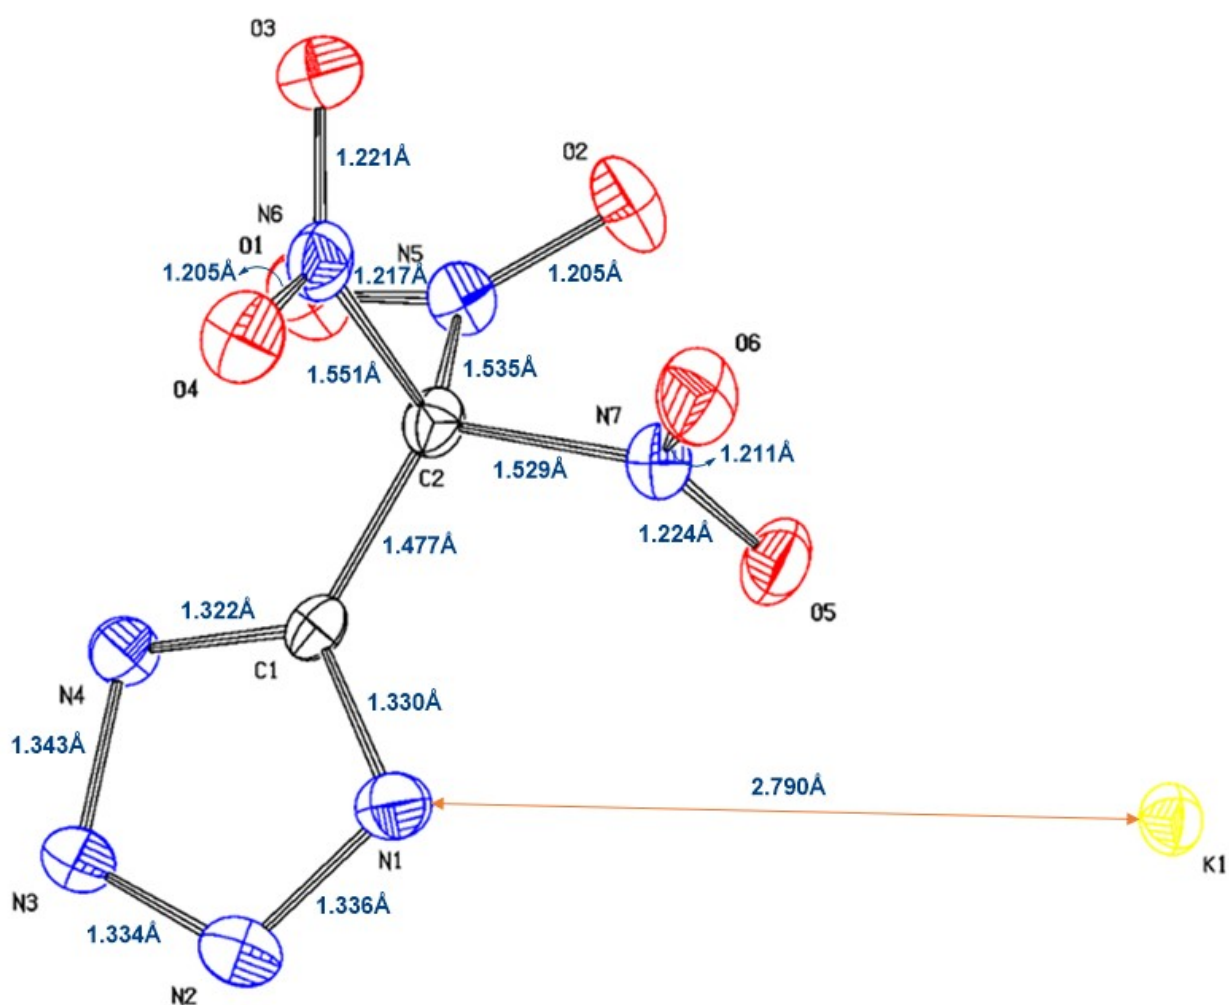

**Fig. S2.** Molecular unit of TNMT-K (thermal ellipsoid at 50%) (CCDC = 2313279).

**Table S2.** Single crystal X-ray data and structure refinement for TNMT-K.

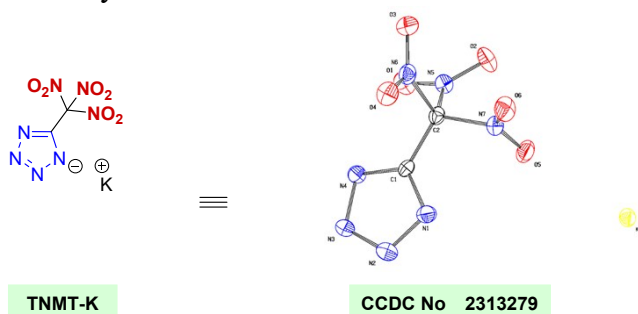

TNMT-K

CCDC No 2313279

| Compound                     | TNMT-K                                        |
|------------------------------|-----------------------------------------------|
| Formula                      | C <sub>2</sub> KN <sub>7</sub> O <sub>6</sub> |
| $D_{calc.}/\text{g cm}^{-3}$ | 1.981                                         |
| $m/\text{mm}^{-1}$           | 5.850                                         |
| Formula Weight               | 257.19                                        |
| Colour                       | yellow                                        |
| Shape                        | block-shaped                                  |
| Size/ $\text{mm}^3$          | 0.07×0.05×0.01                                |
| $T/\text{K}$                 | 100.00(10)                                    |
| Crystal System               | orthorhombic                                  |
| Flack Parameter              | -0.011(16)                                    |
| Hooft Parameter              | -0.008(16)                                    |
| Space Group                  | $P2_12_12_1$                                  |
| $a/\text{Å}$                 | 8.6205(5)                                     |
| $b/\text{Å}$                 | 9.5989(7)                                     |
| $c/\text{Å}$                 | 10.4231(6)                                    |
| $\alpha^\circ$               | 90                                            |
| $\beta^\circ$                | 90                                            |
| $\gamma^\circ$               | 90                                            |
| $V/\text{Å}^3$               | 862.48(9)                                     |
| $Z$                          | 4                                             |
| $Z'$                         | 1                                             |
| Wavelength/ $\text{Å}$       | 1.54184                                       |
| Radiation type               | Cu K $\alpha$                                 |
| $Q_{min}^\circ$              | 6.268                                         |
| $Q_{max}^\circ$              | 77.961                                        |
| Measured Refl's.             | 3224                                          |
| Indep't Refl's               | 1607                                          |
| Refl's $I \geq 2\sigma(I)$   | 1400                                          |
| $R_{int}$                    | 0.0512                                        |
| Parameters                   | 145                                           |
| Restraints                   | 0                                             |
| Largest Peak                 | 0.392                                         |
| Deepest Hole                 | -0.483                                        |
| Goof                         | 1.083                                         |
| $wR_2$ (all data)            | 0.0991                                        |
| $wR_2$                       | 0.0956                                        |
| $R_1$ (all data)             | 0.0516                                        |
| $R_1$                        | 0.0414                                        |

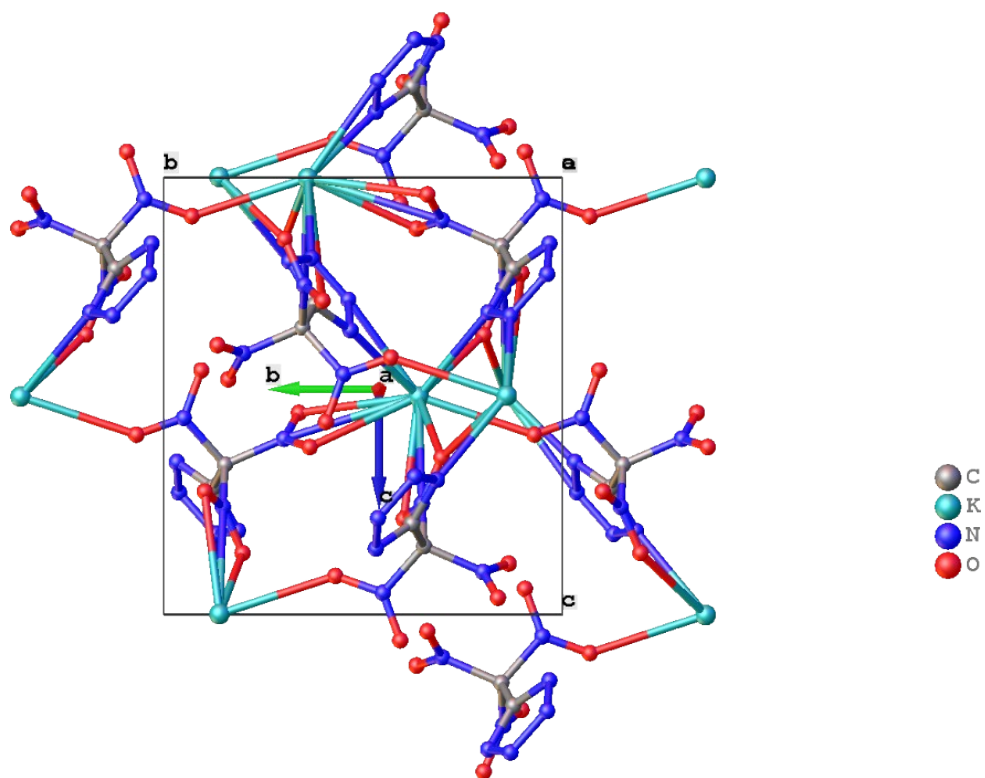

**Fig. 3.** Packing diagram of TNMT-K viewed along the **a** axis

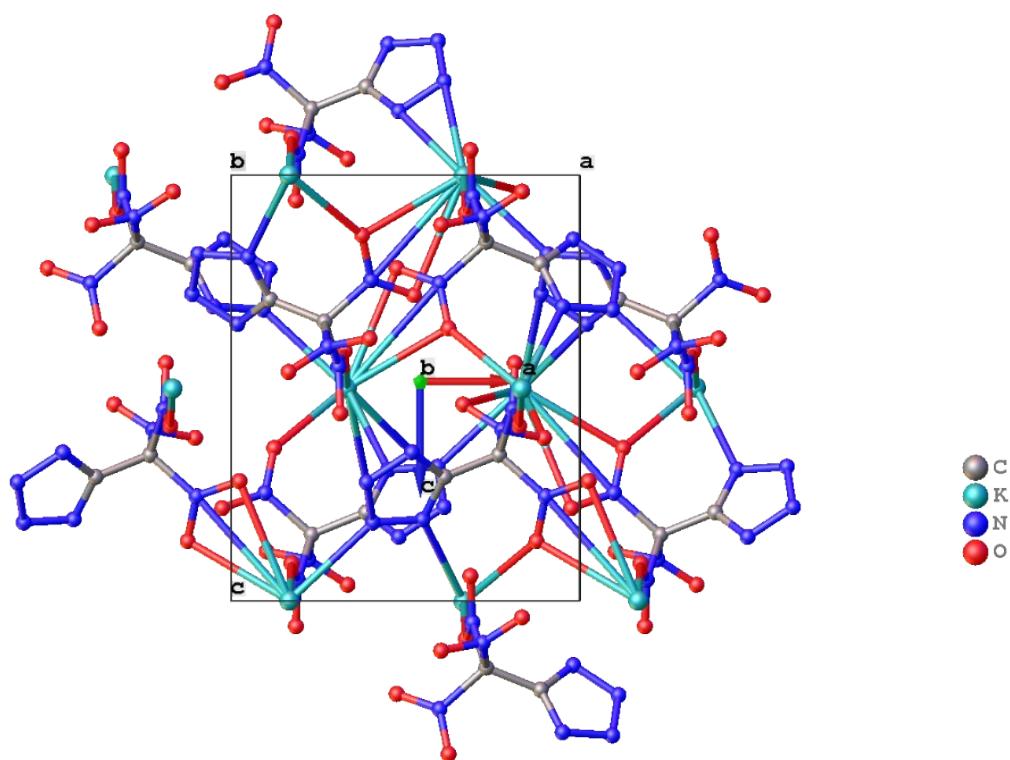

**Fig. 4.** Packing diagram of TNMT-K viewed along the **b** axis

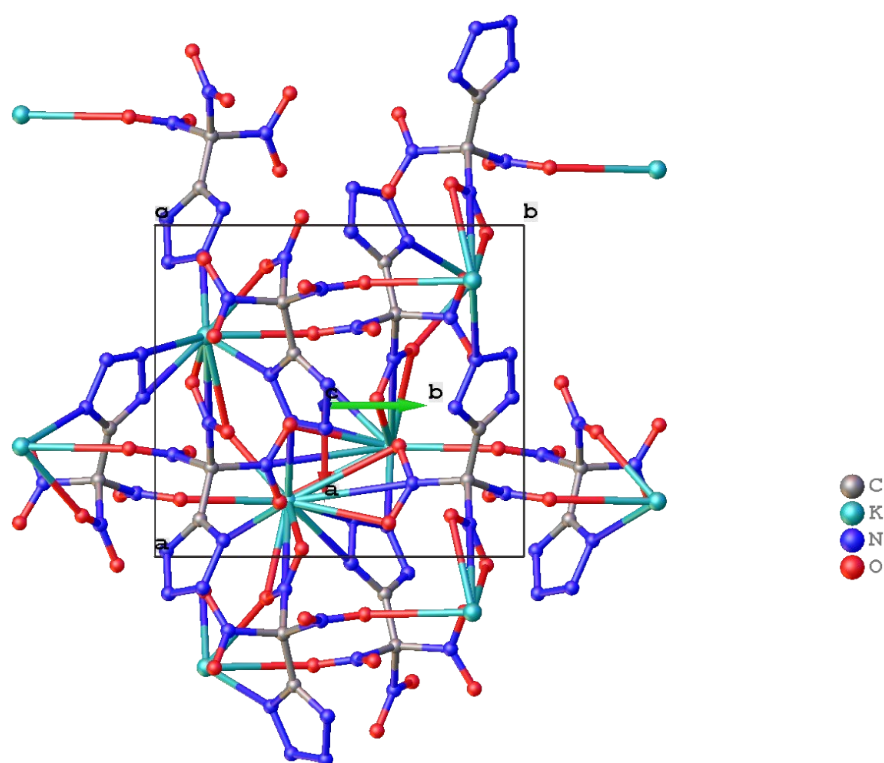

**Fig. 5.** Packing diagram of TNMT-K viewed along the *c* axis

**Table S3.** Fractional Atomic Coordinates ( $\times 10^4$ ) and Equivalent Isotropic Displacement Parameters ( $\text{\AA}^2 \times 10^3$ ) for TNMT-K.

| Atom | x          | y          | z          | $U_{eq}$ |
|------|------------|------------|------------|----------|
| K1   | 3327.4(11) | 1392.6(10) | 4988.1(12) | 19.0(3)  |
| O1   | 3762(4)    | 6970(5)    | 1407(4)    | 27.6(9)  |
| O2   | 5247(4)    | 6019(5)    | 2817(4)    | 30.2(10) |
| O3   | 3975(4)    | 8659(4)    | 3834(4)    | 28.3(9)  |
| O4   | 1655(5)    | 8387(4)    | 4617(4)    | 27.0(9)  |
| O5   | 3265(5)    | 4302(4)    | 4117(4)    | 28.3(9)  |
| O6   | 3135(5)    | 5933(4)    | 5590(4)    | 31.2(10) |
| N1   | 188(5)     | 5319(5)    | 3492(5)    | 23.3(10) |
| N2   | -1109(5)   | 5376(5)    | 2792(5)    | 26.6(11) |
| N3   | -932(5)    | 6296(5)    | 1844(4)    | 22.8(10) |
| N4   | 493(5)     | 6855(5)    | 1916(4)    | 18.7(10) |
| N5   | 4018(5)    | 6477(5)    | 2462(4)    | 22.1(9)  |
| N6   | 2778(5)    | 8011(5)    | 4020(5)    | 22.2(10) |
| N7   | 3080(5)    | 5495(5)    | 4502(5)    | 22.3(10) |
| C1   | 1124(6)    | 6226(6)    | 2916(5)    | 16.4(10) |
| C2   | 2683(6)    | 6529(5)    | 3434(5)    | 17.4(11) |

**Table S4.** Anisotropic Displacement Parameters ( $\times 10^4$ ) for TNMT-K.

| Atom | $U_{11}$ | $U_{22}$ | $U_{33}$ | $U_{23}$ | $U_{13}$ | $U_{12}$ |
|------|----------|----------|----------|----------|----------|----------|
| K1   | 20.7(4)  | 17.1(5)  | 19.0(4)  | -1.6(6)  | -3.4(6)  | 2.4(4)   |
| O1   | 21.5(19) | 40(2)    | 21(2)    | 5.9(18)  | 3.5(15)  | 1.7(17)  |
| O2   | 20.4(18) | 42(3)    | 28(2)    | 3(2)     | -4.5(16) | 8.8(18)  |
| O3   | 28.0(18) | 24.9(19) | 32(2)    | 1(2)     | -1.5(18) | -5.0(19) |
| O4   | 31.0(18) | 25(2)    | 25(2)    | -5.2(15) | 6.1(17)  | 5.4(18)  |
| O5   | 36(2)    | 17.3(18) | 32(2)    | 3.0(17)  | -4(2)    | 2.2(18)  |
| O6   | 43(2)    | 33(2)    | 17(2)    | 1.6(19)  | -9(2)    | 1(2)     |
| N1   | 23(2)    | 23(2)    | 24(2)    | 3(2)     | -2.6(19) | -5(2)    |
| N2   | 18.7(19) | 29(3)    | 32(3)    | 1(2)     | -1(2)    | -3(2)    |
| N3   | 19.9(19) | 23(2)    | 25(2)    | 0(2)     | -5.4(19) | -3(2)    |
| N4   | 18.3(19) | 23(2)    | 15(2)    | 3.9(19)  | 2.2(17)  | -1.7(18) |
| N5   | 20.4(18) | 22(2)    | 24(2)    | 1(2)     | -2.8(18) | 1(2)     |
| N6   | 27(2)    | 21(2)    | 19(2)    | 4(2)     | -3(2)    | 1(2)     |
| N7   | 23(2)    | 21(2)    | 23(2)    | 4(2)     | -3.2(19) | 1(2)     |
| C1   | 20(2)    | 14(2)    | 15(2)    | 3(2)     | 1.9(19)  | -1(2)    |
| C2   | 22(2)    | 15(3)    | 15(3)    | 0(2)     | -1.9(19) | 1(2)     |

**Table S5.** Bond Lengths in Å for TNMT-K.

| Atom | Atom            | Length/Å |
|------|-----------------|----------|
| K1   | O1 <sup>1</sup> | 2.811(4) |
| K1   | O1 <sup>2</sup> | 2.953(4) |
| K1   | O2 <sup>2</sup> | 3.192(4) |
| K1   | O3 <sup>3</sup> | 2.940(4) |
| K1   | O4 <sup>3</sup> | 3.248(4) |
| K1   | O5              | 2.937(4) |
| K1   | N1 <sup>4</sup> | 2.790(5) |
| K1   | N2 <sup>4</sup> | 2.911(5) |
| K1   | N3 <sup>5</sup> | 2.814(4) |
| K1   | N4 <sup>1</sup> | 2.811(4) |
| K1   | N5 <sup>2</sup> | 3.430(5) |
| K1   | N6 <sup>3</sup> | 3.432(5) |
| O1   | N5              | 1.217(6) |
| O2   | N5              | 1.205(6) |
| O3   | N6              | 1.221(6) |
| O4   | N6              | 1.205(6) |
| O5   | N7              | 1.224(6) |
| O6   | N7              | 1.211(6) |
| N1   | N2              | 1.336(6) |
| N1   | C1              | 1.330(7) |
| N2   | N3              | 1.334(7) |
| N3   | N4              | 1.343(6) |
| N4   | C1              | 1.322(7) |
| N5   | C2              | 1.535(7) |
| N6   | C2              | 1.551(7) |
| N7   | C2              | 1.529(7) |
| C1   | C2              | 1.477(7) |

<sup>1</sup>1/2-x,1-y,1/2+z; <sup>2</sup>1-x,-1/2+y,1/2-z; <sup>3</sup>+x,-1+y,+z; <sup>4</sup>1/2+x,1/2-y,1-z; <sup>5</sup>-x,-1/2+y,1/2-z

**Table S6.** Torsion Angles in ° for TNMT-K.

| Atom            | Atom | Atom | Atom            | Angle/°   |
|-----------------|------|------|-----------------|-----------|
| K1 <sup>1</sup> | O1   | N5   | K1 <sup>2</sup> | -170.7(6) |
| K1 <sup>1</sup> | O1   | N5   | O2              | -163.9(4) |
| K1 <sup>2</sup> | O1   | N5   | O2              | 6.9(6)    |
| K1 <sup>1</sup> | O1   | N5   | C2              | 12.4(8)   |
| K1 <sup>2</sup> | O1   | N5   | C2              | -176.9(4) |
| K1 <sup>2</sup> | O2   | N5   | O1              | -6.2(6)   |
| K1 <sup>2</sup> | O2   | N5   | C2              | 177.6(4)  |
| K1 <sup>3</sup> | O3   | N6   | O4              | -4.7(6)   |
| K1 <sup>3</sup> | O3   | N6   | C2              | 175.8(3)  |
| K1 <sup>3</sup> | O4   | N6   | O3              | 4.2(5)    |
| K1 <sup>3</sup> | O4   | N6   | C2              | -176.3(4) |
| K1              | O5   | N7   | O6              | 17.0(10)  |
| K1              | O5   | N7   | C2              | -161.1(4) |
| K1 <sup>4</sup> | N1   | N2   | N3              | 173.5(4)  |
| K1 <sup>5</sup> | N3   | N4   | K1 <sup>1</sup> | 1.6(6)    |
| K1 <sup>5</sup> | N3   | N4   | C1              | -169.9(4) |
| K1 <sup>1</sup> | N4   | C1   | N1              | -170.8(4) |
| K1 <sup>1</sup> | N4   | C1   | C2              | 12.8(8)   |
| O1              | N5   | C2   | N6              | -83.2(5)  |
| O1              | N5   | C2   | N7              | 163.3(4)  |
| O1              | N5   | C2   | C1              | 40.3(7)   |
| O2              | N5   | C2   | N6              | 93.4(5)   |
| O2              | N5   | C2   | N7              | -20.2(6)  |
| O2              | N5   | C2   | C1              | -143.1(5) |
| O3              | N6   | C2   | N5              | -15.0(6)  |
| O3              | N6   | C2   | N7              | 98.3(5)   |
| O3              | N6   | C2   | C1              | -141.0(5) |
| O4              | N6   | C2   | N5              | 165.5(4)  |
| O4              | N6   | C2   | N7              | -81.2(5)  |
| O4              | N6   | C2   | C1              | 39.5(6)   |
| O5              | N7   | C2   | N5              | -58.4(5)  |
| O5              | N7   | C2   | N6              | -170.0(4) |
| O5              | N7   | C2   | C1              | 68.1(6)   |
| O6              | N7   | C2   | N5              | 123.3(5)  |
| O6              | N7   | C2   | N6              | 11.7(6)   |
| O6              | N7   | C2   | C1              | -110.2(5) |
| N1              | N2   | N3   | K1 <sup>5</sup> | 172.2(3)  |
| N1              | N2   | N3   | N4              | -0.1(6)   |
| N1              | C1   | C2   | N5              | 131.1(5)  |
| N1              | C1   | C2   | N6              | -109.3(6) |
| N1              | C1   | C2   | N7              | 9.8(7)    |
| N2              | N1   | C1   | N4              | 0.7(6)    |
| N2              | N1   | C1   | C2              | 177.2(5)  |
| N2              | N3   | N4   | K1 <sup>1</sup> | 172.0(3)  |
| N2              | N3   | N4   | C1              | 0.5(6)    |
| N3              | N4   | C1   | N1              | -0.7(6)   |
| N3              | N4   | C1   | C2              | -177.1(5) |
| N4              | C1   | C2   | N5              | -52.8(7)  |
| N4              | C1   | C2   | N6              | 66.8(7)   |

| <b>Atom</b> | <b>Atom</b> | <b>Atom</b> | <b>Atom</b>     | <b>Angle<sup>o</sup></b> |
|-------------|-------------|-------------|-----------------|--------------------------|
| N4          | C1          | C2          | N7              | -174.1(5)                |
| C1          | N1          | N2          | K1 <sup>4</sup> | -173.8(4)                |
| C1          | N1          | N2          | N3              | -0.4(6)                  |

<sup>1</sup>1/2-x,1-y,-1/2+z; <sup>2</sup>1-x,1/2+y,1/2-z; <sup>3</sup>+x,1+y,+z; <sup>4</sup>-1/2+x,1/2-y,1-z; <sup>5</sup>-x,1/2+y,1/2-z

**Table S7.** Bond Angles in ° for TNMT-K.

| Atom            | Atom | Atom            | Angle/°    |
|-----------------|------|-----------------|------------|
| O1 <sup>1</sup> | K1   | O1 <sup>2</sup> | 134.32(6)  |
| O1 <sup>1</sup> | K1   | O2 <sup>2</sup> | 142.32(12) |
| O1 <sup>2</sup> | K1   | O2 <sup>2</sup> | 40.78(10)  |
| O1 <sup>1</sup> | K1   | O3 <sup>3</sup> | 146.73(12) |
| O1 <sup>2</sup> | K1   | O4 <sup>3</sup> | 119.02(11) |
| O1 <sup>1</sup> | K1   | O4 <sup>3</sup> | 105.97(11) |
| O1 <sup>1</sup> | K1   | O5              | 67.61(12)  |
| O1 <sup>1</sup> | K1   | N2 <sup>4</sup> | 90.85(13)  |
| O1 <sup>1</sup> | K1   | N3 <sup>5</sup> | 84.57(12)  |
| O1 <sup>2</sup> | K1   | N5 <sup>2</sup> | 20.27(10)  |
| O1 <sup>1</sup> | K1   | N5 <sup>2</sup> | 143.70(12) |
| O1 <sup>1</sup> | K1   | N6 <sup>3</sup> | 126.52(12) |
| O1 <sup>2</sup> | K1   | N6 <sup>3</sup> | 98.63(12)  |
| O2 <sup>2</sup> | K1   | O4 <sup>3</sup> | 87.82(10)  |
| O2 <sup>2</sup> | K1   | N5 <sup>2</sup> | 20.57(10)  |
| O2 <sup>2</sup> | K1   | N6 <sup>3</sup> | 71.20(11)  |
| O3 <sup>3</sup> | K1   | O1 <sup>2</sup> | 78.72(11)  |
| O3 <sup>3</sup> | K1   | O2 <sup>2</sup> | 56.75(12)  |
| O3 <sup>3</sup> | K1   | O4 <sup>3</sup> | 40.79(10)  |
| O3 <sup>3</sup> | K1   | N5 <sup>2</sup> | 65.78(11)  |
| O3 <sup>3</sup> | K1   | N6 <sup>3</sup> | 20.26(10)  |
| O4 <sup>3</sup> | K1   | N5 <sup>2</sup> | 103.21(11) |
| O4 <sup>3</sup> | K1   | N6 <sup>3</sup> | 20.55(9)   |
| O5              | K1   | O1 <sup>2</sup> | 71.63(12)  |
| O5              | K1   | O2 <sup>2</sup> | 80.26(12)  |
| O5              | K1   | O3 <sup>3</sup> | 136.52(12) |
| O5              | K1   | O4 <sup>3</sup> | 143.10(11) |
| O5              | K1   | N5 <sup>2</sup> | 76.09(12)  |
| O5              | K1   | N6 <sup>3</sup> | 143.70(12) |
| N1 <sup>4</sup> | K1   | O1 <sup>2</sup> | 84.35(12)  |
| N1 <sup>4</sup> | K1   | O1 <sup>1</sup> | 113.50(13) |
| N1 <sup>4</sup> | K1   | O2 <sup>2</sup> | 103.46(13) |
| N1 <sup>4</sup> | K1   | O3 <sup>3</sup> | 66.28(13)  |
| N1 <sup>4</sup> | K1   | O4 <sup>3</sup> | 78.44(12)  |
| N1 <sup>4</sup> | K1   | O5              | 138.25(13) |
| N1 <sup>4</sup> | K1   | N2 <sup>4</sup> | 27.01(13)  |
| N1 <sup>4</sup> | K1   | N3 <sup>5</sup> | 142.00(15) |
| N1 <sup>4</sup> | K1   | N4 <sup>1</sup> | 74.82(14)  |
| N1 <sup>4</sup> | K1   | N5 <sup>2</sup> | 93.06(12)  |
| N1 <sup>4</sup> | K1   | N6 <sup>3</sup> | 71.90(13)  |
| N2 <sup>4</sup> | K1   | O1 <sup>2</sup> | 111.05(12) |
| N2 <sup>4</sup> | K1   | O2 <sup>2</sup> | 126.76(12) |
| N2 <sup>4</sup> | K1   | O3 <sup>3</sup> | 76.88(13)  |
| N2 <sup>4</sup> | K1   | O4 <sup>3</sup> | 69.54(12)  |
| N2 <sup>4</sup> | K1   | O5              | 143.46(14) |
| N2 <sup>4</sup> | K1   | N5 <sup>2</sup> | 119.63(12) |
| N2 <sup>4</sup> | K1   | N6 <sup>3</sup> | 72.84(13)  |

| Atom            | Atom | Atom             | Angle/°    |
|-----------------|------|------------------|------------|
| N3 <sup>5</sup> | K1   | O1 <sup>2</sup>  | 107.18(13) |
| N3 <sup>5</sup> | K1   | O2 <sup>2</sup>  | 69.94(12)  |
| N3 <sup>5</sup> | K1   | O3 <sup>3</sup>  | 80.35(13)  |
| N3 <sup>5</sup> | K1   | O4 <sup>3</sup>  | 64.19(13)  |
| N3 <sup>5</sup> | K1   | O5               | 78.93(13)  |
| N3 <sup>5</sup> | K1   | N2 <sup>4</sup>  | 130.00(14) |
| N3 <sup>5</sup> | K1   | N5 <sup>2</sup>  | 89.13(12)  |
| N3 <sup>5</sup> | K1   | N6 <sup>3</sup>  | 70.62(13)  |
| N4 <sup>1</sup> | K1   | O1 <sup>2</sup>  | 86.13(12)  |
| N4 <sup>1</sup> | K1   | O1 <sup>1</sup>  | 61.38(12)  |
| N4 <sup>1</sup> | K1   | O2 <sup>2</sup>  | 125.66(12) |
| N4 <sup>1</sup> | K1   | O3 <sup>3</sup>  | 139.27(12) |
| N4 <sup>1</sup> | K1   | O4 <sup>3</sup>  | 140.99(12) |
| N4 <sup>1</sup> | K1   | O5               | 70.04(13)  |
| N4 <sup>1</sup> | K1   | N2 <sup>4</sup>  | 73.76(14)  |
| N4 <sup>1</sup> | K1   | N3 <sup>5</sup>  | 140.38(14) |
| N4 <sup>1</sup> | K1   | N5 <sup>2</sup>  | 106.07(12) |
| N4 <sup>1</sup> | K1   | N6 <sup>3</sup>  | 145.69(13) |
| N5 <sup>2</sup> | K1   | N6 <sup>3</sup>  | 84.01(12)  |
| K1 <sup>6</sup> | O1   | K1 <sup>7</sup>  | 112.97(13) |
| N5              | O1   | K1 <sup>7</sup>  | 102.6(3)   |
| N5              | O1   | K1 <sup>6</sup>  | 144.0(3)   |
| N5              | O2   | K1 <sup>7</sup>  | 90.9(3)    |
| N6              | O3   | K1 <sup>8</sup>  | 103.2(3)   |
| N6              | O4   | K1 <sup>8</sup>  | 88.3(3)    |
| N7              | O5   | K1               | 142.3(4)   |
| N2              | N1   | K1 <sup>9</sup>  | 81.5(3)    |
| C1              | N1   | K1 <sup>9</sup>  | 172.1(4)   |
| C1              | N1   | N2               | 103.6(4)   |
| N1              | N2   | K1 <sup>9</sup>  | 71.5(3)    |
| N3              | N2   | K1 <sup>9</sup>  | 173.7(4)   |
| N3              | N2   | N1               | 109.6(4)   |
| N2              | N3   | K1 <sup>10</sup> | 116.1(3)   |
| N2              | N3   | N4               | 109.1(4)   |
| N4              | N3   | K1 <sup>10</sup> | 134.1(3)   |
| N3              | N4   | K1 <sup>6</sup>  | 122.0(3)   |
| C1              | N4   | K1 <sup>6</sup>  | 133.5(3)   |
| C1              | N4   | N3               | 103.8(4)   |
| O1              | N5   | K1 <sup>7</sup>  | 57.2(3)    |
| O1              | N5   | C2               | 116.6(4)   |
| O2              | N5   | K1 <sup>7</sup>  | 68.5(3)    |
| O2              | N5   | O1               | 125.4(5)   |
| O2              | N5   | C2               | 117.9(4)   |
| C2              | N5   | K1 <sup>7</sup>  | 173.2(3)   |
| O3              | N6   | K1 <sup>8</sup>  | 56.5(3)    |
| O3              | N6   | C2               | 116.7(4)   |
| O4              | N6   | K1 <sup>8</sup>  | 71.1(3)    |
| O4              | N6   | O3               | 127.5(5)   |
| O4              | N6   | C2               | 115.8(4)   |

| Atom | Atom | Atom            | Angle/°  |
|------|------|-----------------|----------|
| C2   | N6   | K1 <sup>8</sup> | 172.3(3) |
| O5   | N7   | C2              | 113.5(5) |
| O6   | N7   | O5              | 128.8(5) |
| O6   | N7   | C2              | 117.7(4) |
| N1   | C1   | C2              | 121.0(5) |
| N4   | C1   | N1              | 113.9(4) |
| N4   | C1   | C2              | 125.0(5) |
| N5   | C2   | N6              | 104.5(4) |
| N7   | C2   | N5              | 107.0(4) |
| N7   | C2   | N6              | 107.3(4) |
| C1   | C2   | N5              | 115.8(4) |
| C1   | C2   | N6              | 111.8(4) |
| C1   | C2   | N7              | 110.0(4) |

<sup>1</sup>1/2-x,1-y,1/2+z; <sup>2</sup>1-x,-1/2+y,1/2-z; <sup>3</sup>+x,-1+y,+z; <sup>4</sup>1/2+x,1/2-y,1-z; <sup>5</sup>-x,-1/2+y,1/2-z; <sup>6</sup>1/2-x,1-y,-1/2+z; <sup>7</sup>1-x,1/2+y,1/2-z; <sup>8</sup>+x,1+y,+z; <sup>9</sup>-1/2+x,1/2-y,1-z; <sup>10</sup>-x,1/2+y,1/2-z

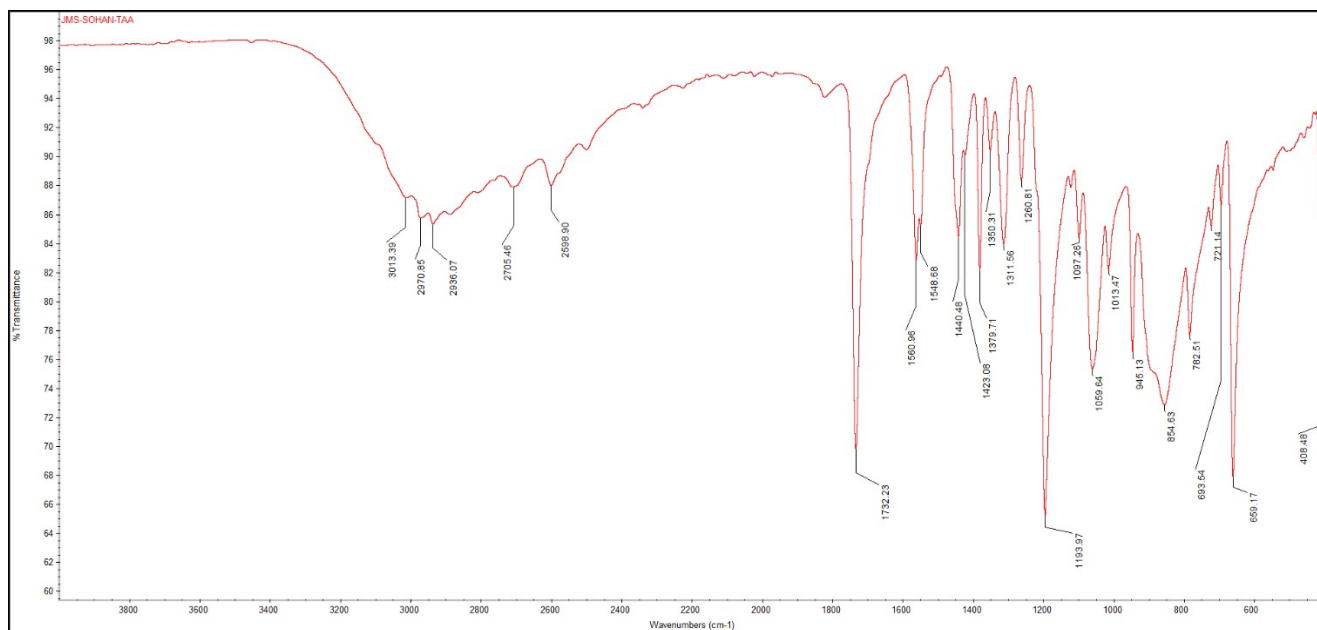

**Fig. S6.** FTIR-Spectrum of TAA (1).

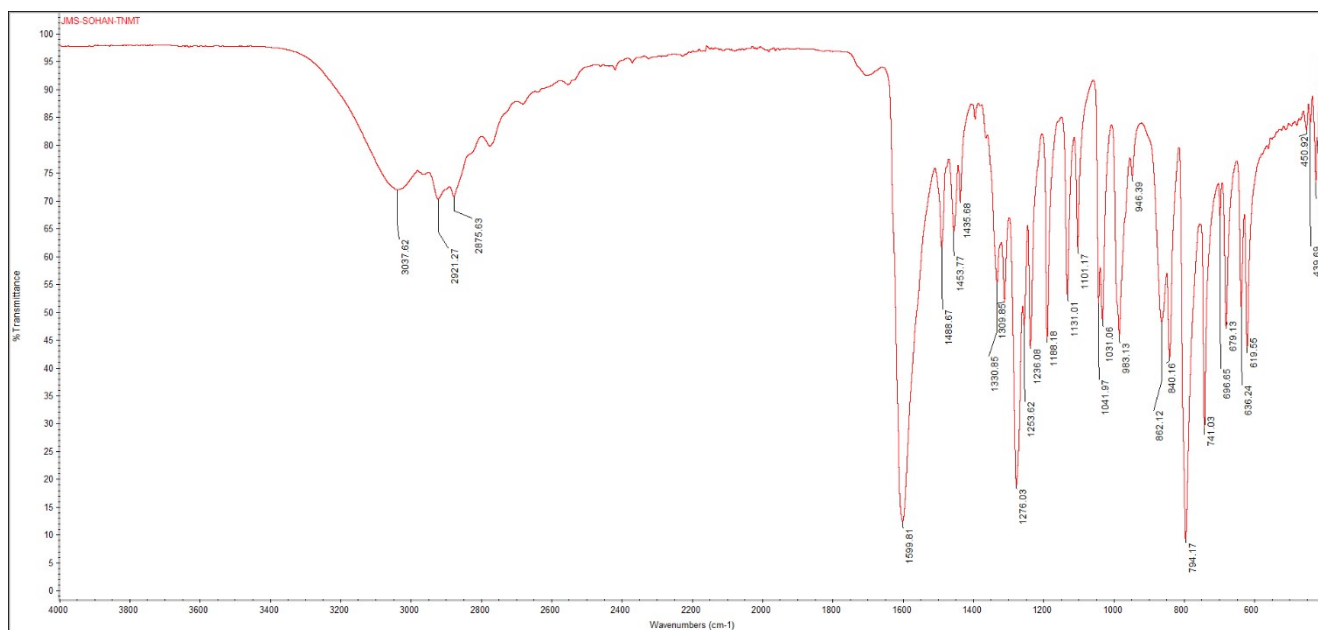

Fig. S7. FTIR-Spectrum of TNMT (2).

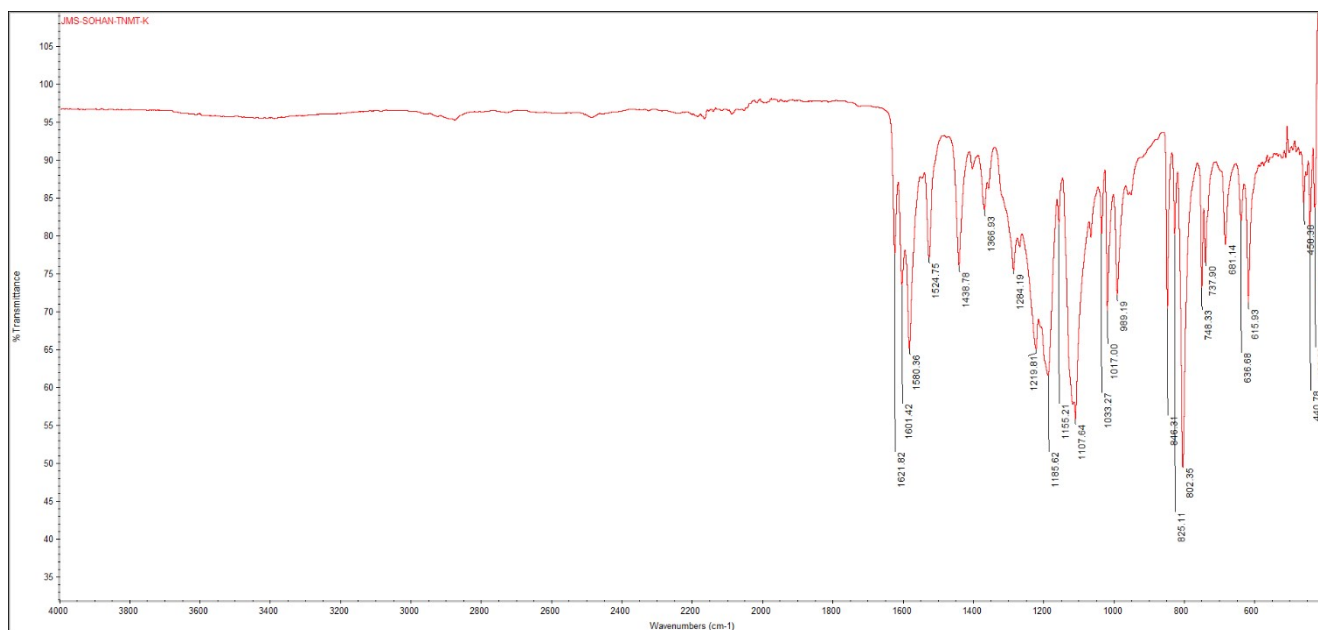

Fig. S8. FTIR-Spectrum of TNMT-K.

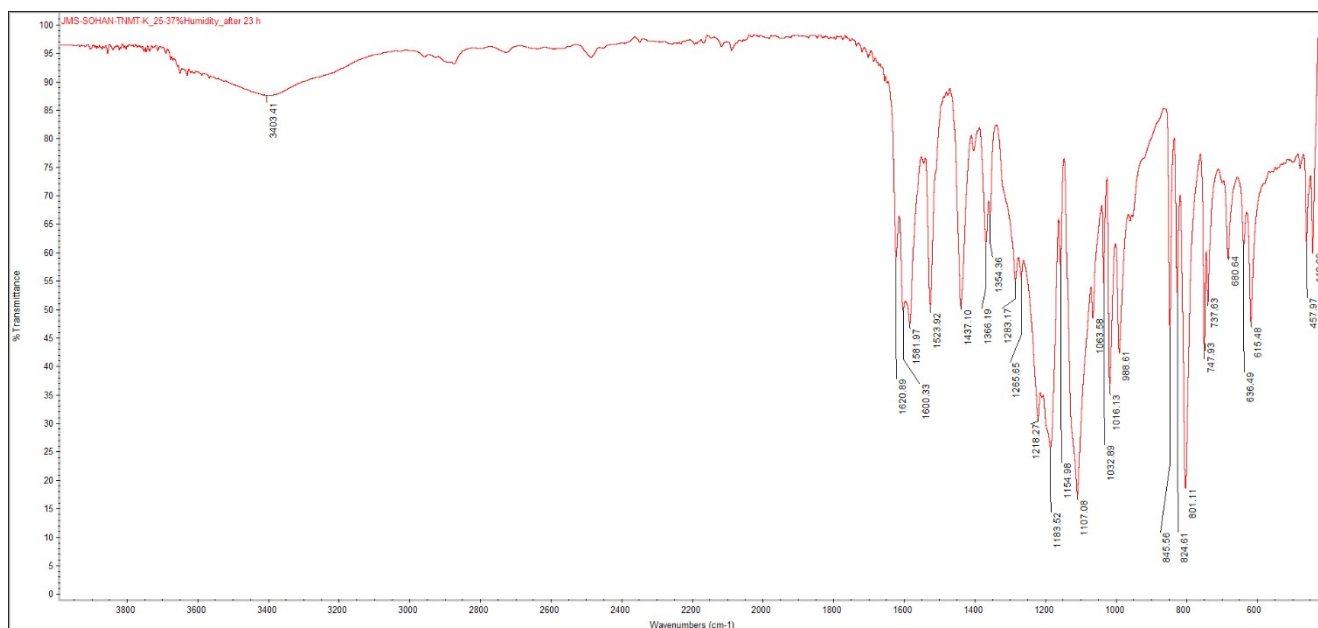

**Fig. S9.** FTIR-Spectrum of TNMT-K sample stored at 23-37% humidity after 23 hours.

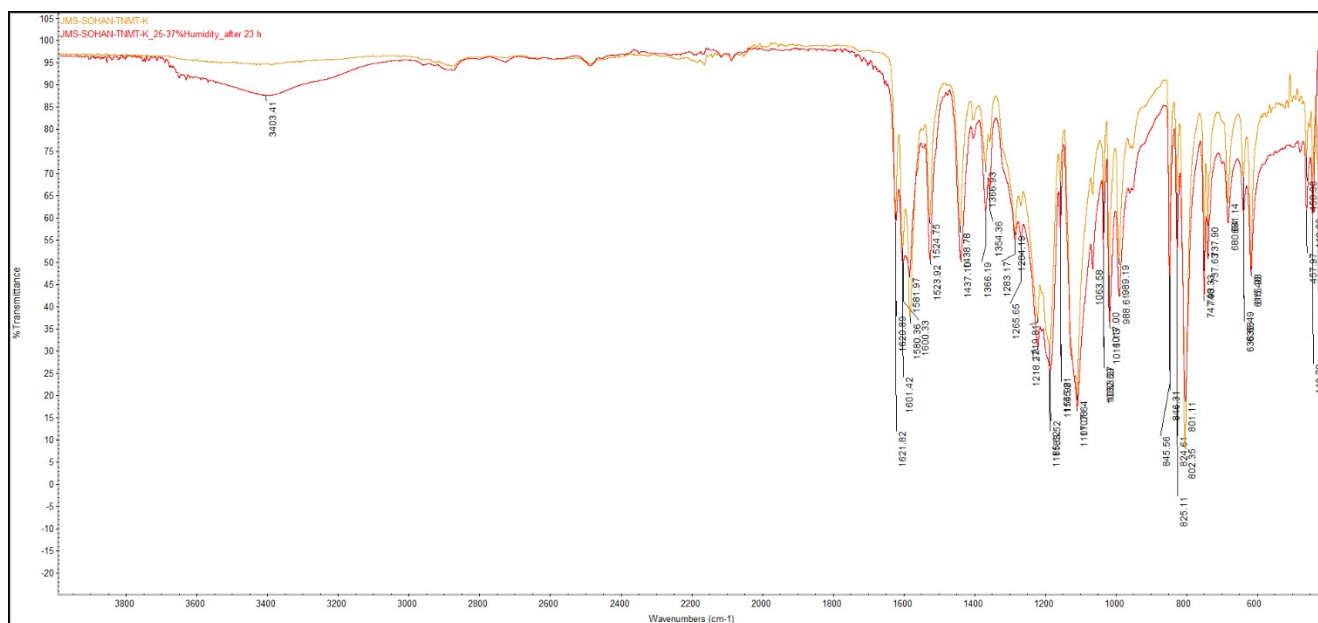

**Fig. S10.** Comparison of FTIR-Spectrum of TNMT-K and a TNMT-K sample stored at 23-37% humidity after 23 hours.

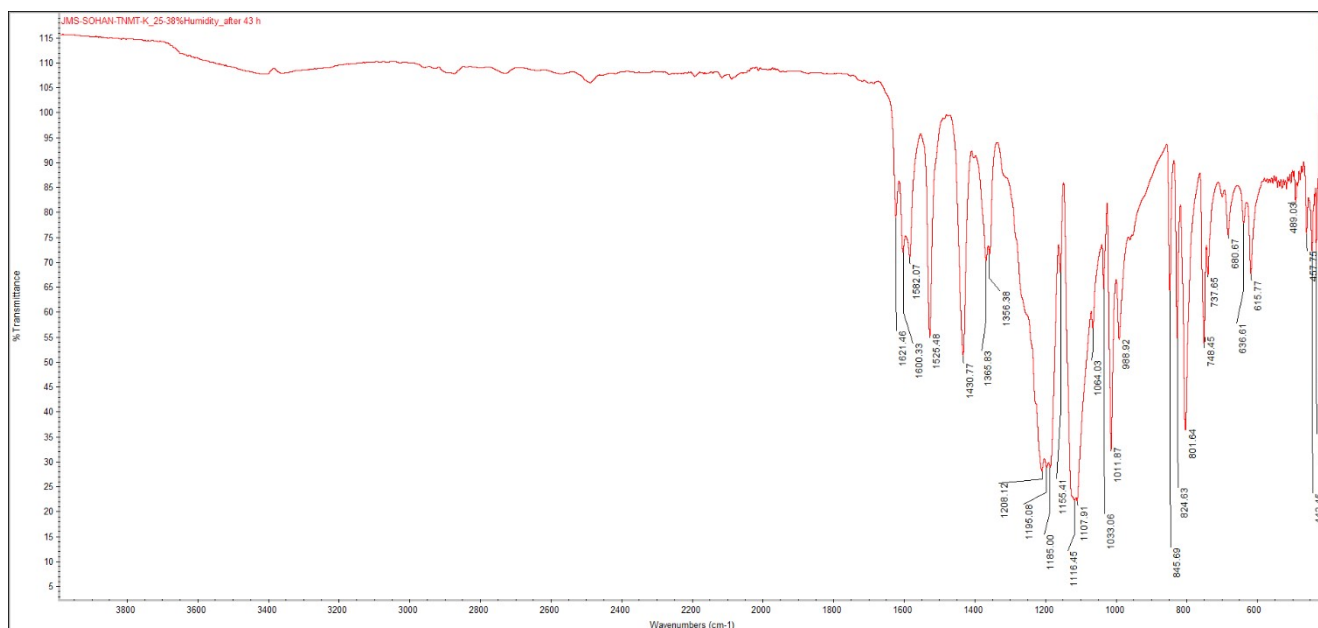

**Fig. S11.** FTIR-Spectrum of TNMT-K sample stored at 25-38% humidity after 43 hours.

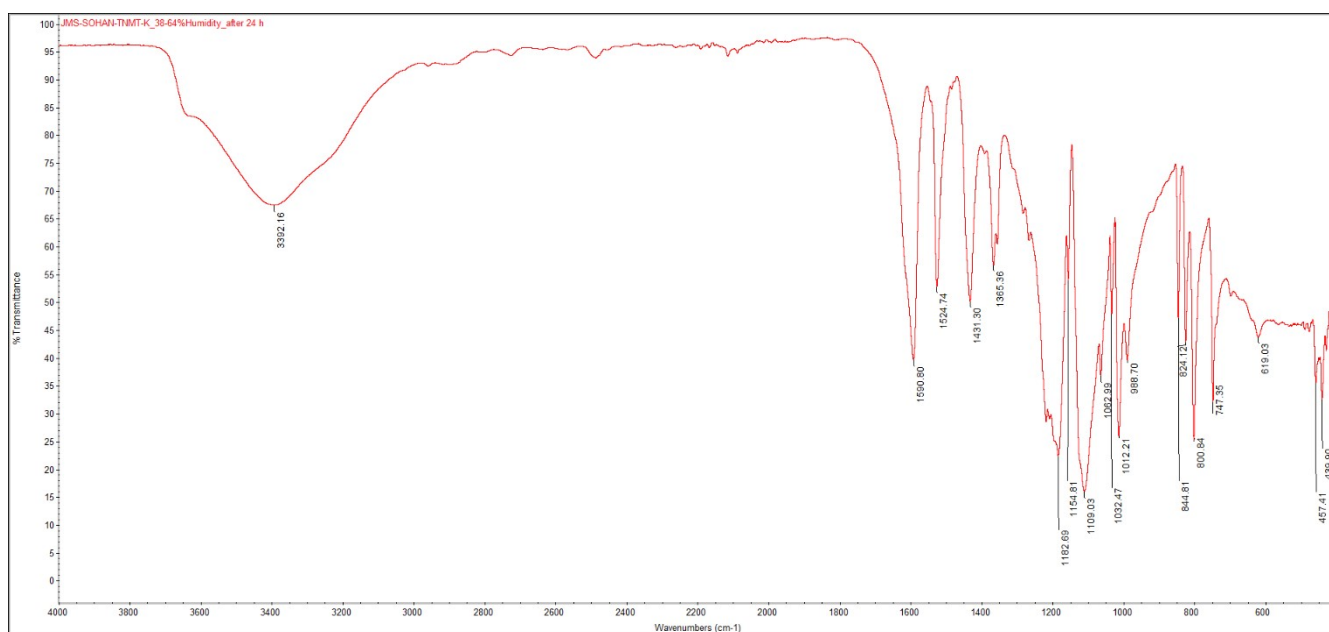

**Fig. S12.** FTIR-Spectrum of TNMT-K sample stored at 38-64% humidity after 24 hours.

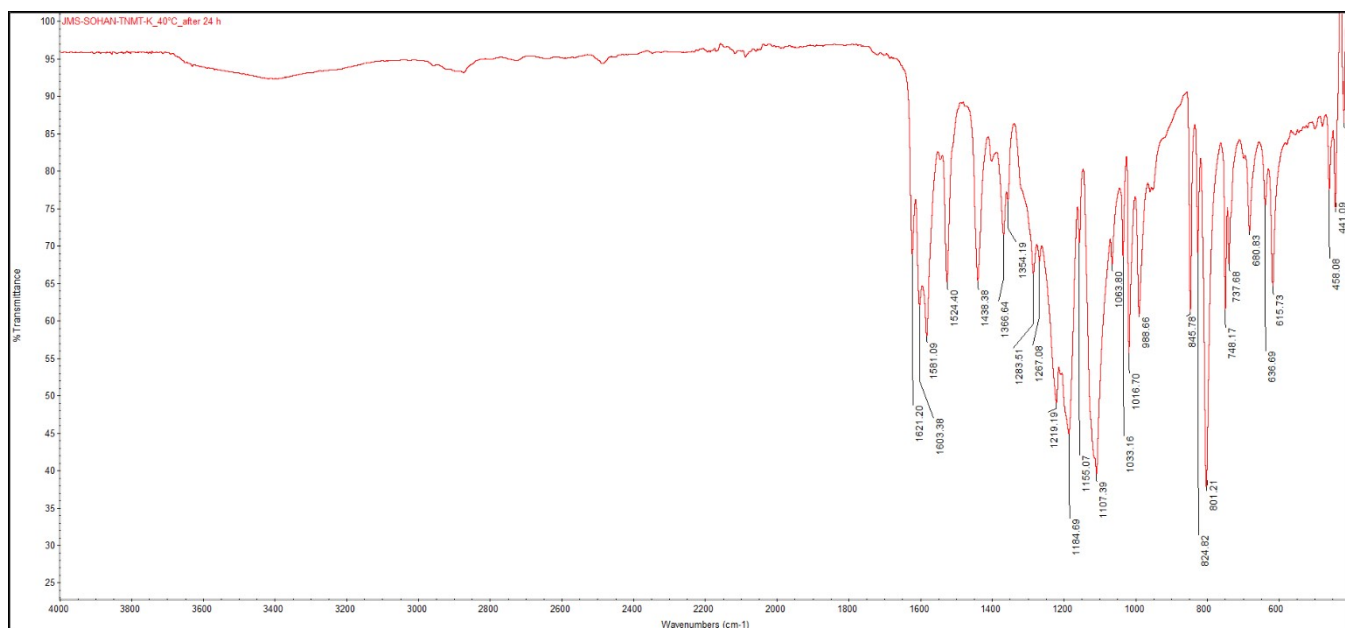

**Fig. S13.** FTIR-Spectrum of TNMT-K sample stored at 40 °C for 24 hours.

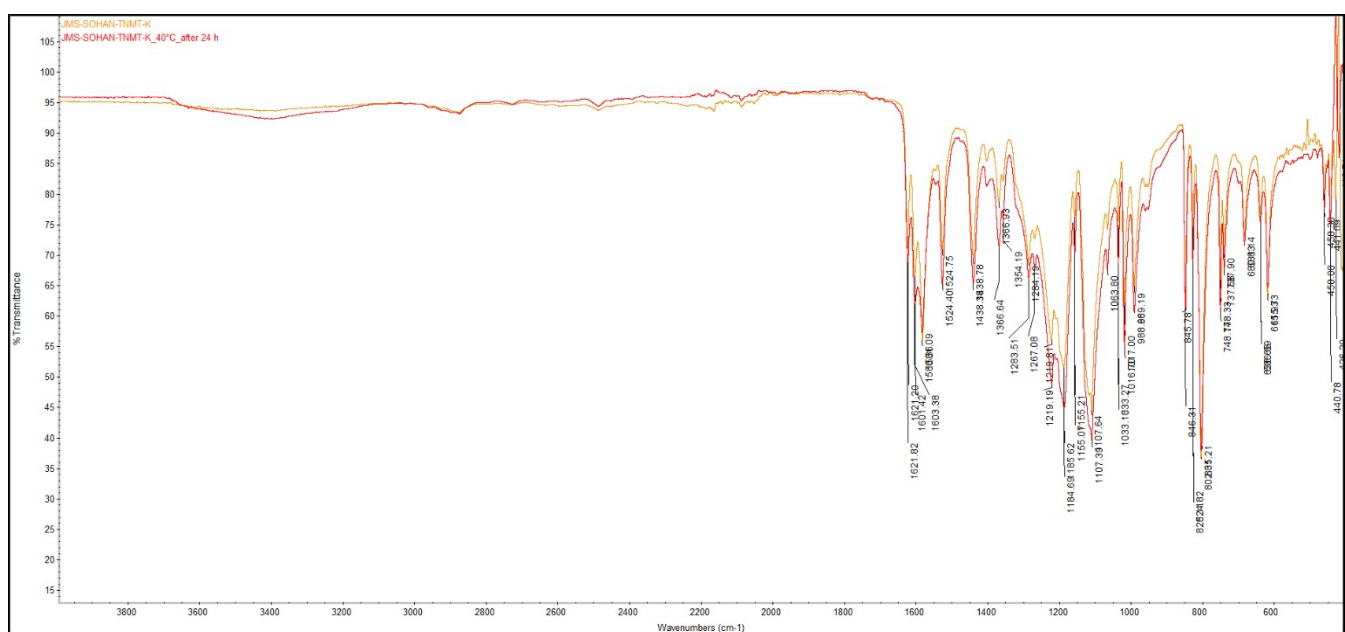

**Fig. S14.** Comparison of the FTIR spectra of TNMT-K and a TNMT-K sample stored at 40 °C for 24 hours.

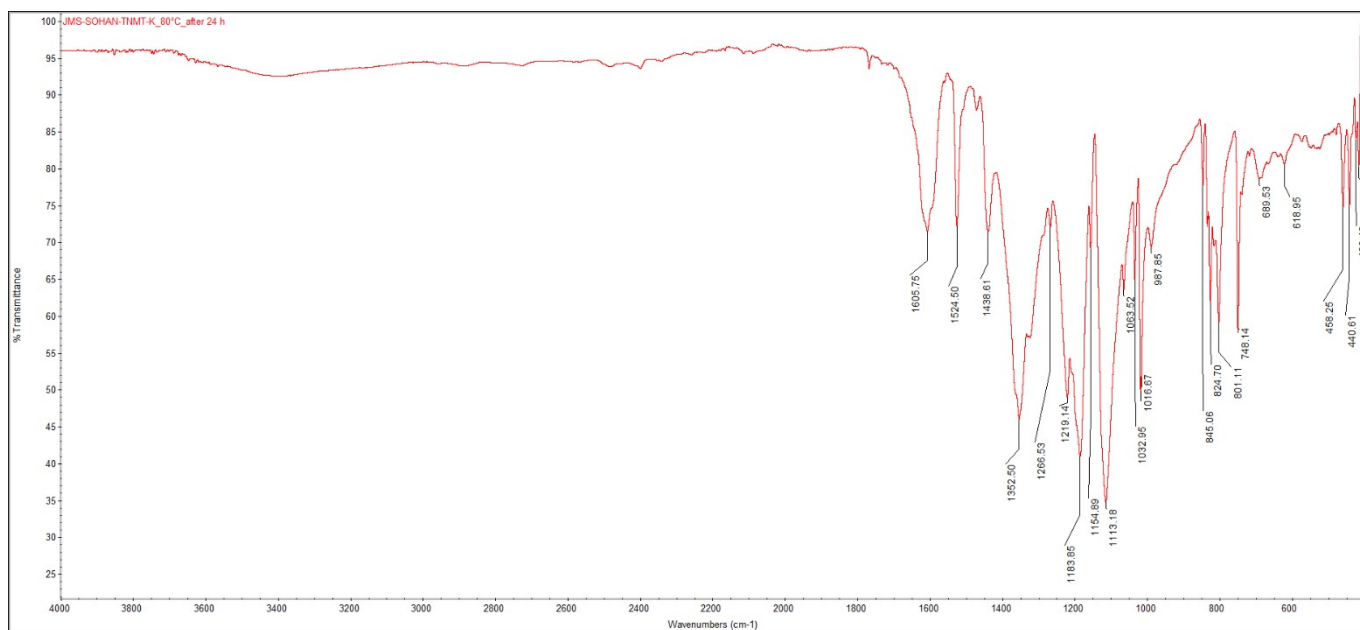

**Fig. S15.** FTIR-Spectrum of TNMT-K sample stored at 80 °C for 24 hours.

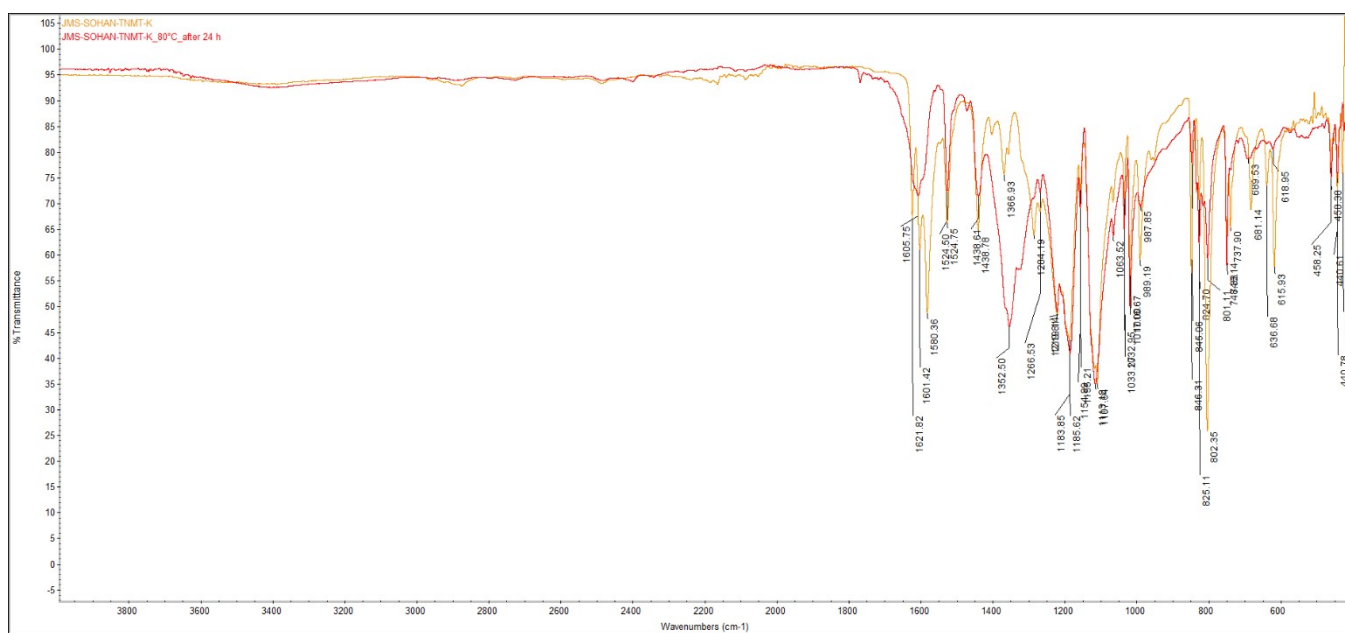

**Fig. S16.** Comparison of the FTIR spectra of TNMT-K and a TNMT-K sample stored at 80 °C for 24 hours.

**1D PROTON**

Sample : JMS-SOHAN-TAA  
Solvent : DMSO  
Custom : JMS-SOHAN-TAA

Acquisition Date : 2026-03-15 20:46:15  
Number of scans : 15  
Acquisition time : 6.5536 s  
Repetition time : 15 s  
Pulse angle : 90 degrees  
Experiment Duration : 00:03:46

Processing  
Resolution enhancement : 0.3 LB + 0.3 GB  
Line broadening : Exponential = 0 Hz  
Gaussian = 0 Hz  
Phasing : P0 = -200.10 P1 = 0.00  
Baseline correction : Applied

Meta data  
Instrument : SPA4176  
Instrument type : 60 CARBON  
Software version : 2.3.8.7004  
Spinsolve User Setup : Spinsolve  
Spinsolve User Acquisition : Spinsolve  
Spinsolve User Processing : Spinsolve  
Logged in Windows user : PRS  
Data folder : c:\projects\data\2026\03\15\JMS-SOHAN-TAA\20260315-204614-JMS-SOHAN-TAA-1D PROTON

Backup folder :  
Last shim : 2026-03-15 20:14:11  
Shim linewidth @ 50% : 0.45 Hz  
Shim linewidth @ 0.55% : 13.76 Hz  
Shim SNR : 19037

| Integrals | PPM Range   | Calibrated | Absolute |
|-----------|-------------|------------|----------|
|           | 2.65 - 2.37 | 1.00       | 26.74    |
|           | 4.28 - 3.77 | 13.98      | 373.66   |

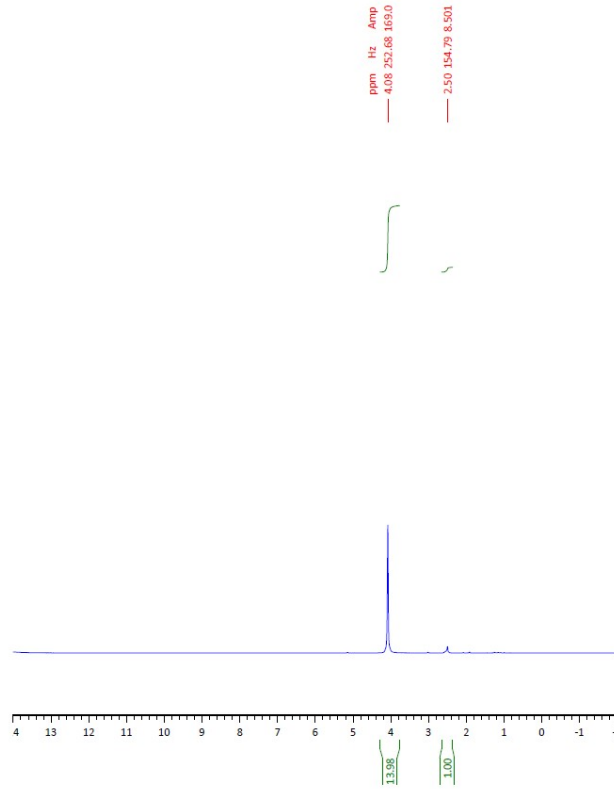

**Fig. S17.** <sup>1</sup>H NMR Spectrum of TAA (1)

**1D CARBON WALTZ**

Sample : JMS-SOHAN-TAA  
Solvent : DMSO  
Custom : JMS-SOHAN-TAA

Acquisition Date : 2026-03-16 11:57:03  
Number of scans : 4522  
Acquisition time : 1.6384 s  
Repetition time : 3 s  
Pulse angle : 45 degrees  
Center frequency : 110 ppm  
Bandwidth : 320.93 ppm  
NOE amplitude : -22.1 dB  
Decouple amplitude : -22.1 dB  
Experiment Duration : 03:48:14

Processing  
Line broadening : Exponential = 2 Hz  
Gaussian = 0 Hz  
Phasing : P0 = -125.10 P1 = 0.00  
Baseline correction : Applied

Meta data  
Instrument : SPA4176  
Instrument type : 60 CARBON  
Software version : 2.3.8.7004  
Spinsolve User Setup : Spinsolve  
Spinsolve User Acquisition : Spinsolve  
Spinsolve User Processing : Spinsolve  
Logged in Windows user : PRS  
Data folder : c:\projects\data\2026\03\16\JMS-SOHAN-TAA\20260316-115703-JMS-SOHAN-TAA-1D CARBON WALTZ

Backup folder :  
Last shim : 2026-03-16 11:54:19  
Shim linewidth @ 50% : 0.69 Hz  
Shim linewidth @ 0.55% : 16.05 Hz  
Shim SNR : 18883

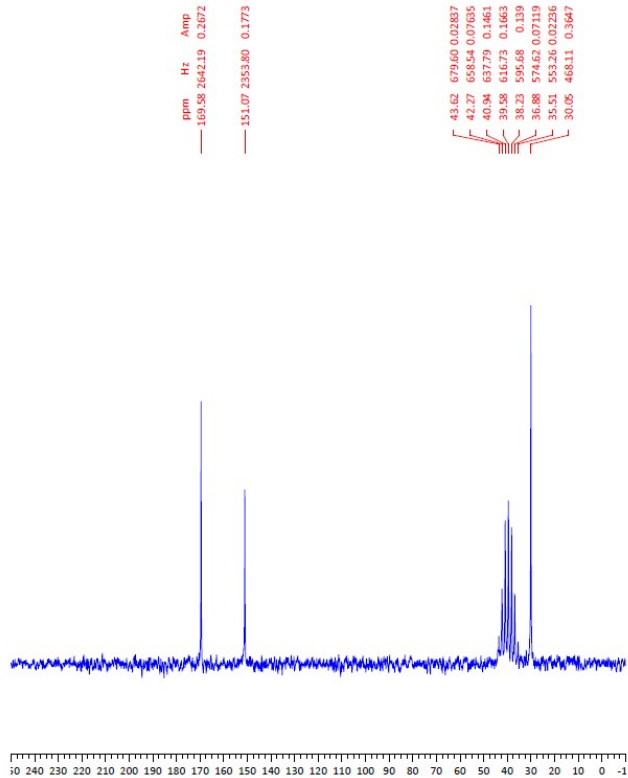

**Fig. S18.** <sup>13</sup>C NMR Spectrum of TAA (1)

### 1D PROTON

Sample : JMS-SOHAN-TNMT  
Solvent : Acetone  
Custom : JMS-SOHAN-TNMT

Acquisition Date : 2026-03-16 15:56:47  
Number of scans : 40  
Acquisition time : 6.5536 s  
Repetition time : 15 s  
Pulse angle : 90 degrees  
Experiment Duration : 00:09:54

Processing  
Resolution enhancement : 0.3 LB + 0.3 GB  
Line broadening : Exponential = 0 Hz  
Gaussian = 0 Hz  
PO = -76.10 P1 = 0.00  
Phasing :  
Baseline correction : Applied

Meta data  
Instrument : SPA4176  
Instrument type : 60 CARBON  
Software version : 2.3.8.7004  
Spinsolve User Setup : Spinsolve  
Spinsolve User Acquisition : Spinsolve  
Spinsolve User Processing : Spinsolve  
Logged in Windows user : PRS  
Data folder : c:\projects\data\2026\03\16\UMS-S  
OHAN-TNMT\20260316-155646-JM  
S-SOHAN-TNMT-1D PROTON

Backup folder :  
Last shim : 2026-03-16 11:54:19  
Shim linewidth @ 50% : 0.69 Hz  
Shim linewidth @ 0.55% : 16.05 Hz  
Shim SNR : 18883

| PPM Range     | Calibrated | Absolute |
|---------------|------------|----------|
| 2.25 - 1.83   | 0.89       | 355.65   |
| 11.56 - 11.00 | 1.00       | 412.66   |

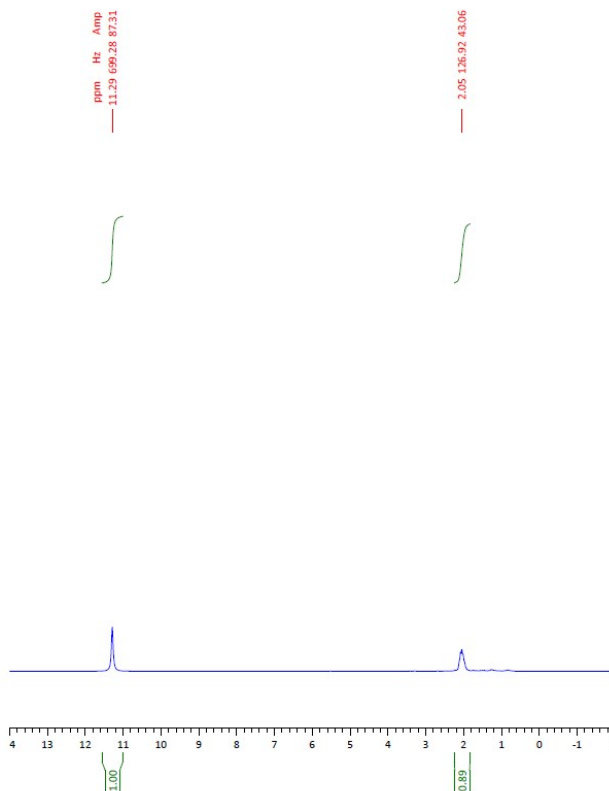

Fig. S19. <sup>1</sup>H NMR Spectrum of TNMT (2).

### 1D CARBON WALTZ

Sample : JMS-SOHAN-TNMT  
Solvent : Acetone  
Custom : JMS-SOHAN-TNMT

Acquisition Date : 2026-03-18 17:23:03  
Number of scans : 55904  
Acquisition time : 1.6384 s  
Repetition time : 3 s  
Pulse angle : 45 degrees  
Center frequency : 110 ppm  
Bandwidth : 320.92 ppm  
NOE amplitude : -22.1 dB  
Decouple amplitude : -22.1 dB  
Experiment Duration : 47:05:37

Processing  
Line broadening : Exponential = 1 Hz  
Gaussian = 0 Hz  
PO = -130.90 P1 = 0.00  
Phasing :  
Baseline correction : Applied

Meta data  
Instrument : SPA4176  
Instrument type : 60 CARBON  
Software version : 2.3.8.7004  
Spinsolve User Setup : Spinsolve  
Spinsolve User Acquisition : Spinsolve  
Spinsolve User Processing : Spinsolve  
Logged in Windows user : PRS  
Data folder : c:\projects\data\2026\03\18\UMS-S  
OHAN-TNMT\20260318-172302-JM  
S-SOHAN-TNMT-1D CARBON WALTZ

Backup folder :  
Last shim : 2026-03-18 17:15:30  
Shim linewidth @ 50% : 0.56 Hz  
Shim linewidth @ 0.55% : 14.34 Hz  
Shim SNR : 19073

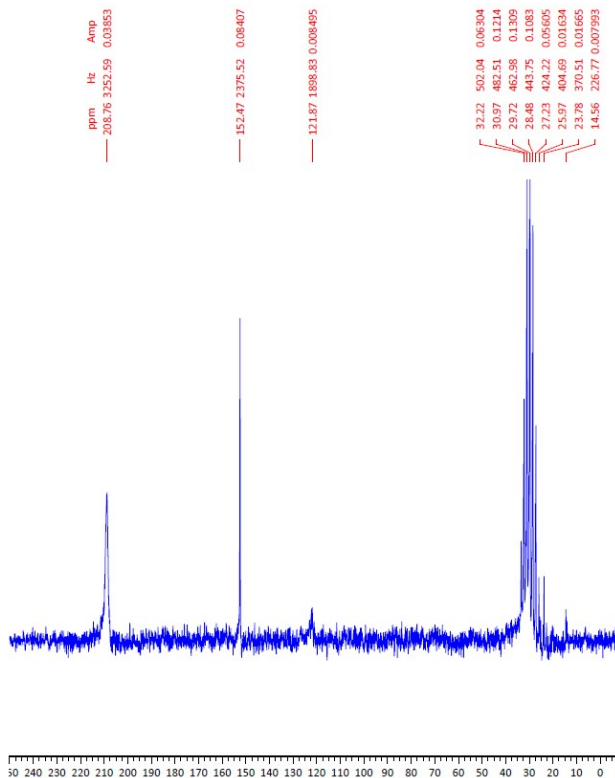

Fig. S20. <sup>13</sup>C NMR Spectrum of TNMT (2).

### 1D PROTON

Sample : JMS-SOHAN-TNMT-K  
Solvent : DMSO  
Custom : JMS-SOHAN-TNMT-K

Acquisition Date : 2026-03-21 15:23:09  
Number of scans : 32  
Acquisition time : 6.5536 s  
Repetition time : 15 s  
Pulse angle : 90 degrees  
Experiment Duration : 00:07:54

Processing  
Resolution enhancement : 0.3 LB + 0.3 GB  
Line broadening : Exponential = 1 Hz  
Gaussian = 0 Hz  
Phasing : P0 = -1.00 P1 = 0.00  
Baseline correction : Applied

Meta data  
Instrument : SPA4176  
Instrument type : 60 CARBON  
Software version : 2.3.8.7004  
Spinsolve User Setup : Spinsolve  
Spinsolve User Acquisition : Spinsolve  
Spinsolve User Processing : Spinsolve  
Logged in Windows user : PRS  
Data folder : c:\projects\data\2026\03\21\UMS-S  
OHAN-TNMT-K\20260321-152308-J  
MS-SOHAN-TNMT-K-1D PROTON

Backup folder :  
Last shim : 2026-03-21 14:43:44  
Shim linewidth @ 50% : 0.64 Hz  
Shim linewidth @ 0.55% : 15.01 Hz  
Shim SNR : 19411

| PPM Range   | Calibrated | Absolute |
|-------------|------------|----------|
| 2.03 - 1.69 | 0.03       | 27.69    |
| 2.61 - 2.34 | 0.02       | 15.33    |
| 4.15 - 3.10 | 1.00       | 835.30   |

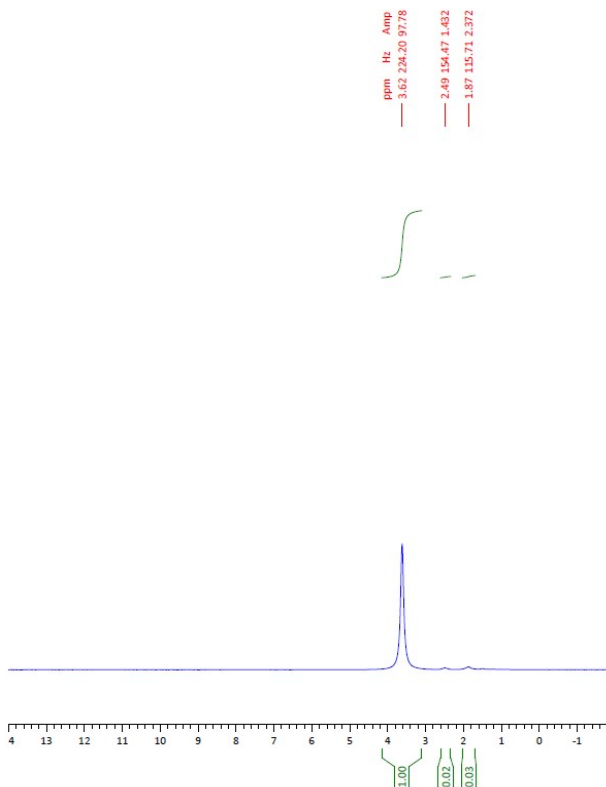

Fig. S21. <sup>1</sup>H NMR Spectrum of TNMT-K

### 1D CARBON WALTZ

Sample : JMS-SOHAN-TNMT-K  
Solvent : DMSO  
Custom : JMS-SOHAN-TNMT-K

Acquisition Date : 2026-03-21 16:25:17  
Number of scans : 58314  
Acquisition time : 1.6384 s  
Repetition time : 3 s  
Pulse angle : 45 degrees  
Center frequency : 110 ppm  
Bandwidth : 320.92 ppm  
NOE amplitude : -22.1 dB  
Decouple amplitude : -22.1 dB  
Experiment Duration : 49:14:35

Processing  
Line broadening : Exponential = 2 Hz  
Gaussian = 0 Hz  
Phasing : P0 = -129.50 P1 = 0.00  
Baseline correction : Applied

Meta data  
Instrument : SPA4176  
Instrument type : 60 CARBON  
Software version : 2.3.8.7004  
Spinsolve User Setup : Spinsolve  
Spinsolve User Acquisition : Spinsolve  
Spinsolve User Processing : Spinsolve  
Logged in Windows user : PRS  
Data folder : c:\projects\data\2026\03\21\UMS-S  
OHAN-TNMT-K\20260321-162517-J  
MS-SOHAN-TNMT-K-1D CARBON W  
ALTZ

Backup folder :  
Last shim : 2026-03-21 14:43:44  
Shim linewidth @ 50% : 0.64 Hz  
Shim linewidth @ 0.55% : 15.01 Hz  
Shim SNR : 19411

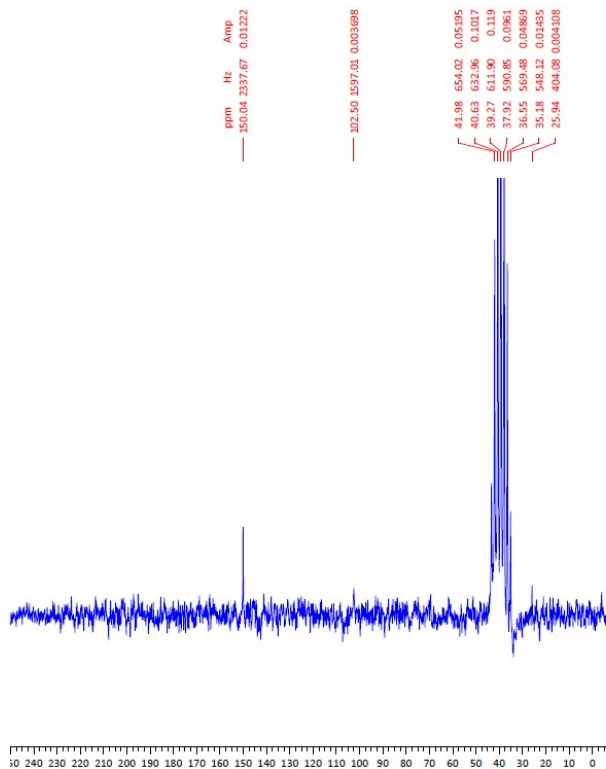

Fig. S22. <sup>13</sup>C NMR Spectrum of TNMT-K

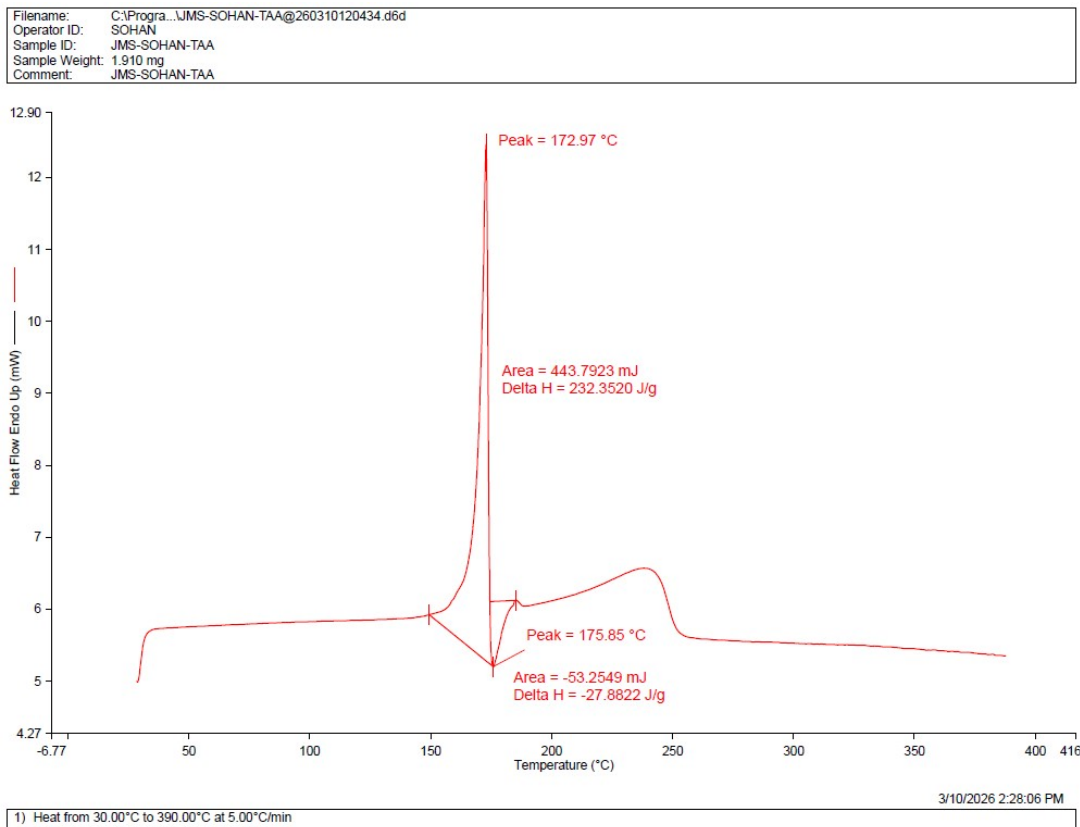

**Fig. S23.** DSC plot of TAA (a) at 5 °C min<sup>-1</sup>

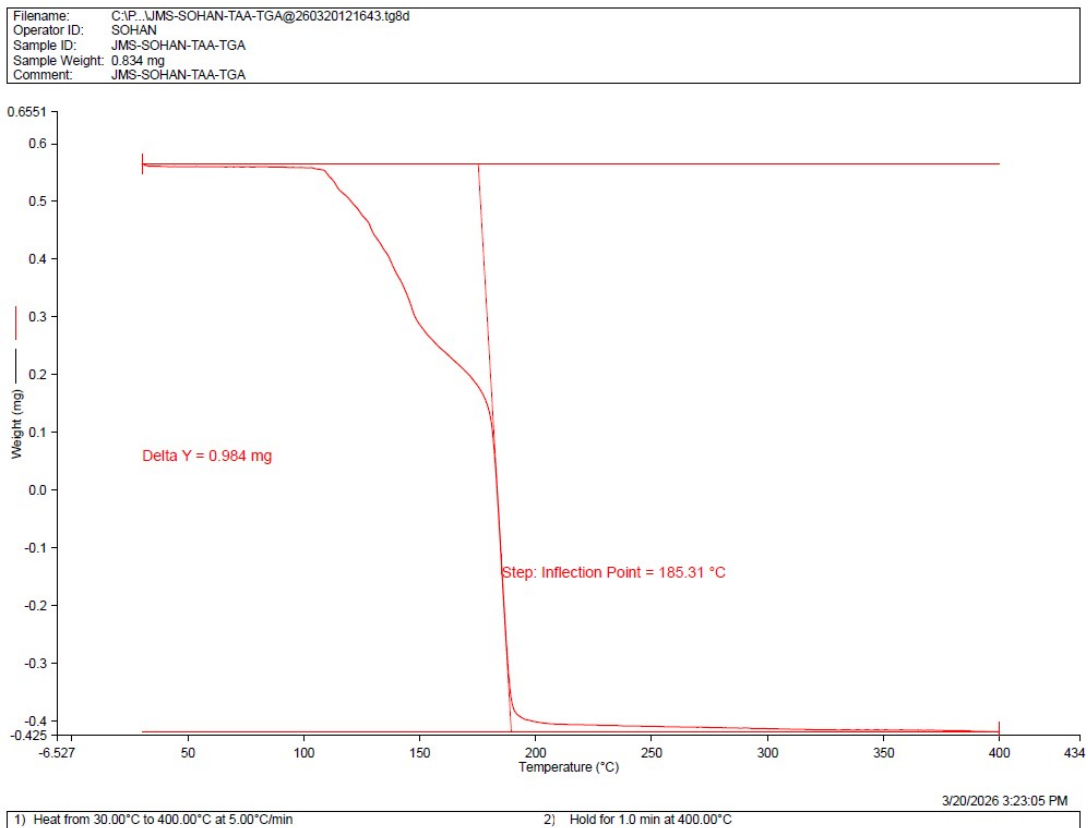

**Fig. S24.** TGA plot of TAA (1) at 5 °C min<sup>-1</sup>

Filename: C:\Progr...\JMS-SOHAN-TNMT@260320103433.d6d  
Operator ID: SOHAN  
Sample ID: JMS-SOHAN-TNMT  
Sample Weight: 0.280 mg  
Comment: JMS-SOHAN-TNMT

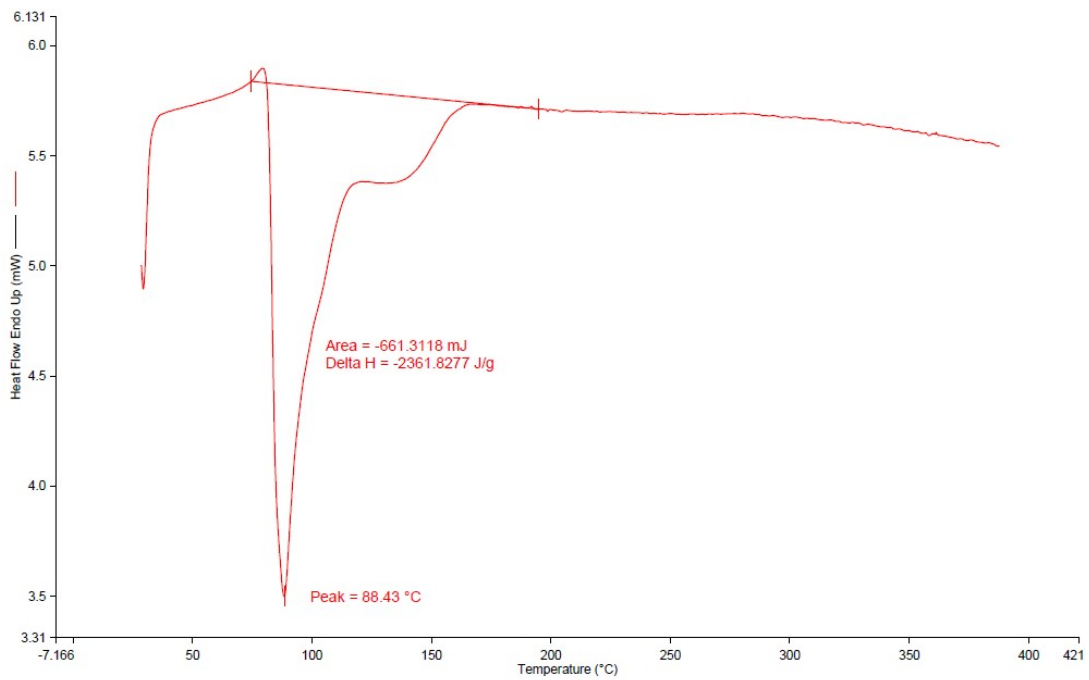

3/20/2026 12:02:50 PM

1) Heat from 30.00°C to 390.00°C at 5.00°C/min

Fig. S25. DSC plot of TNMT (2) at 5 °C min<sup>-1</sup>

Filename: C:\Program Files (x86)...\JMS-SOHAN-TNMT.tg8d  
Operator ID: SOHAN  
Sample ID: JMS-SOHAN-TNMT  
Sample Weight: 0.999 mg  
Comment: JMS-SOHAN-TNMT

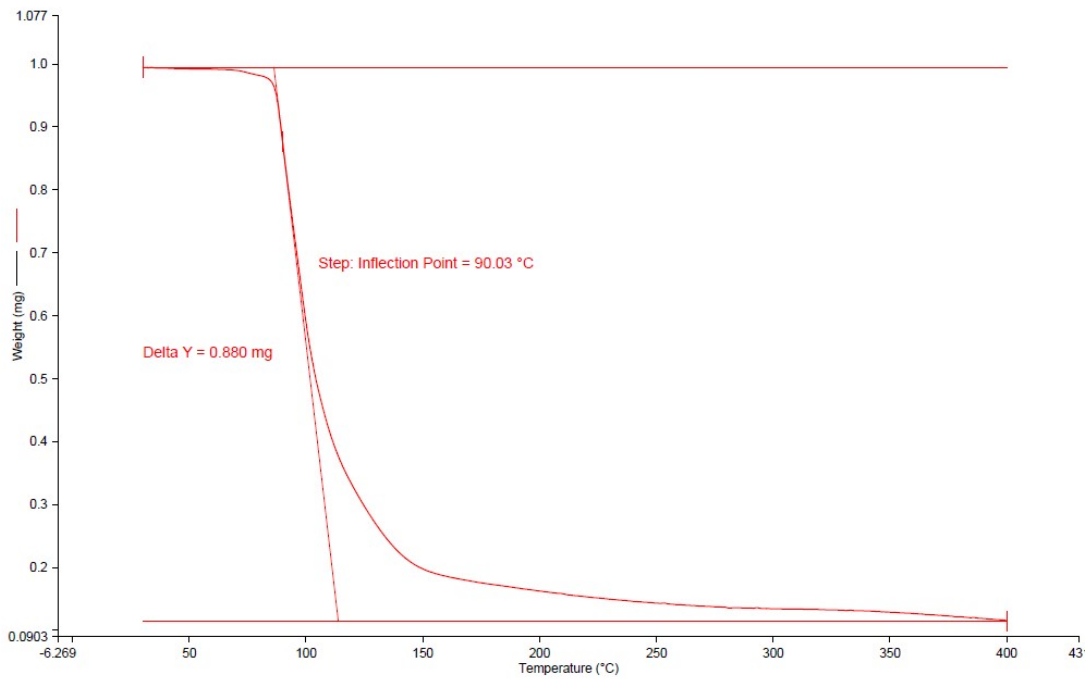

3/11/2026 10:20:54 AM

1) Heat from 30.00°C to 400.00°C at 5.00°C/min

2) Hold for 1.0 min at 400.00°C

Fig. S26. TGA plot of TNMT (2) at 5 °C min<sup>-1</sup>

Sample: SOHAN-860-K at 5°C  
Size: 0.1000 mg  
Method: Ramp

DSC

File: E:\...\DSC-TGA\DSC\SOHAN-860-K at 5°C.001  
Operator: SOHAN  
Run Date: 28-Nov-2023 15:55  
Instrument: DSC Q2000 V24.11 Build 124

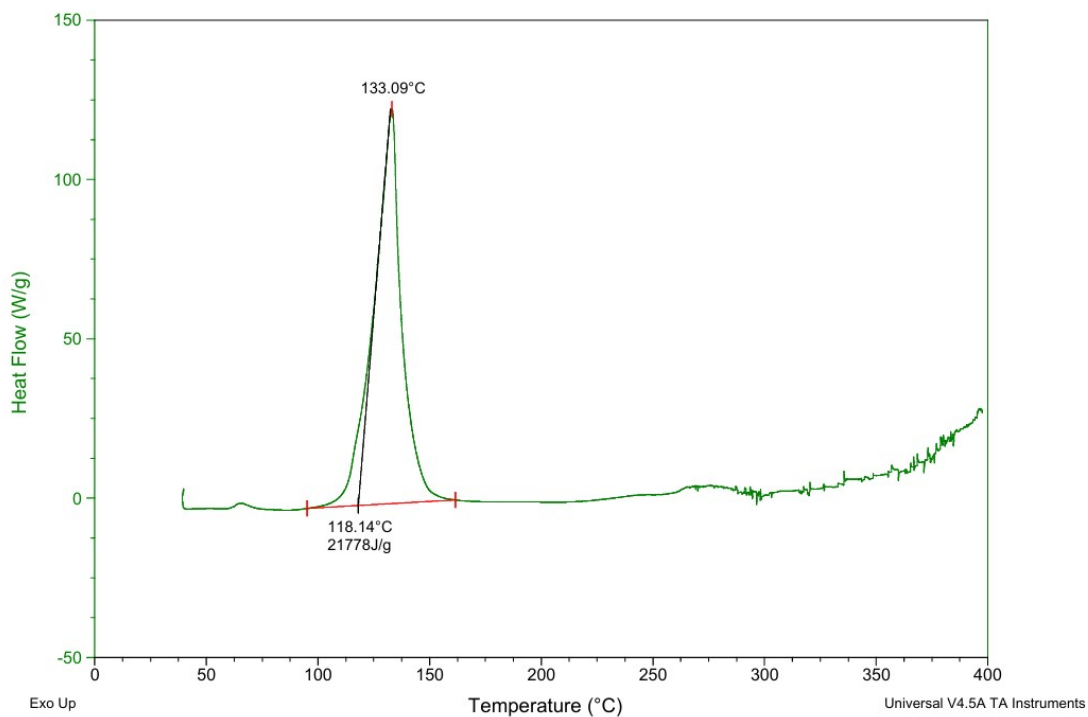

**Fig. S27.** DSC plot of TNMT-K at 5 °C min<sup>-1</sup>

Sample: SOHAN-860-K at 10°C  
Size: 0.1000 mg  
Method: Ramp

DSC

File: E:\...\DSC\SOHAN-860-K at 10°C.001  
Operator: SOHAN  
Run Date: 28-Nov-2023 17:34  
Instrument: DSC Q2000 V24.11 Build 124

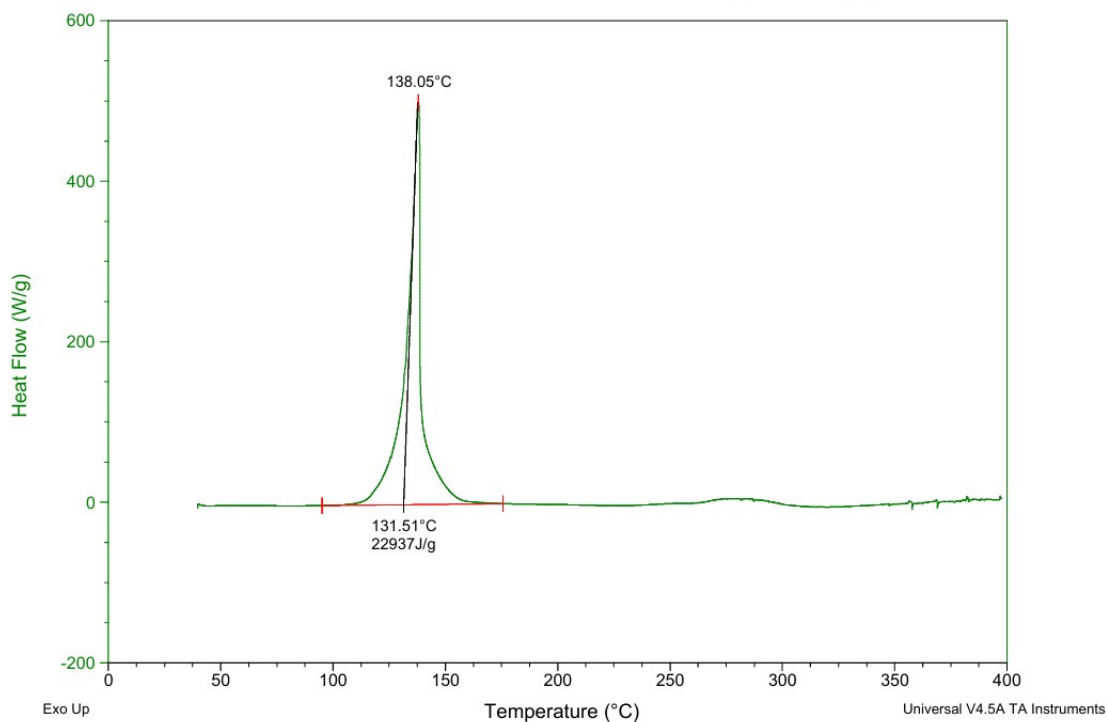

**Fig. S28.** DSC plot of TNMT-K at 10 °C min<sup>-1</sup>

Filename: C:\JMS-SOHAN-TNMT-K-TGA@260321165337.tg8d  
Operator ID: SOHAN  
Sample ID: JMS-SOHAN-TNMT-K-TGA  
Sample Weight: 0.297 mg  
Comment: JMS-SOHAN-TNMT-K-TGA

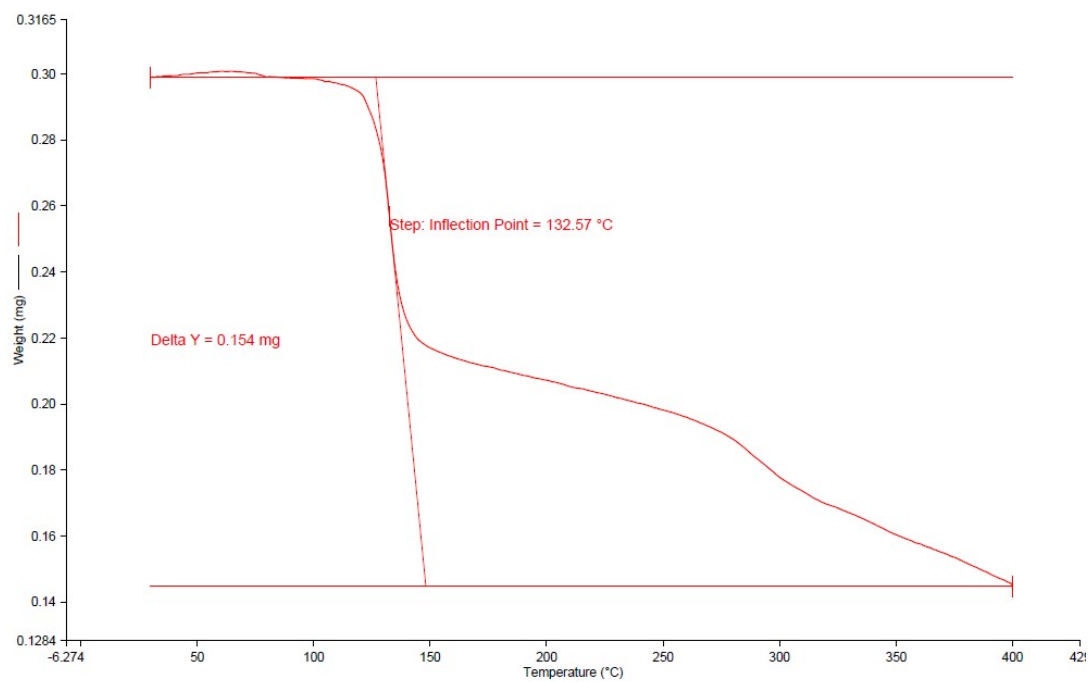

3/22/2026 4:10:47 PM

1) Heat from 30.00°C to 400.00°C at 5.00°C/min

2) Hold for 1.0 min at 400.00°C

**Fig. S29.** DSC plot of TNMT-K at 5 °C min<sup>-1</sup>

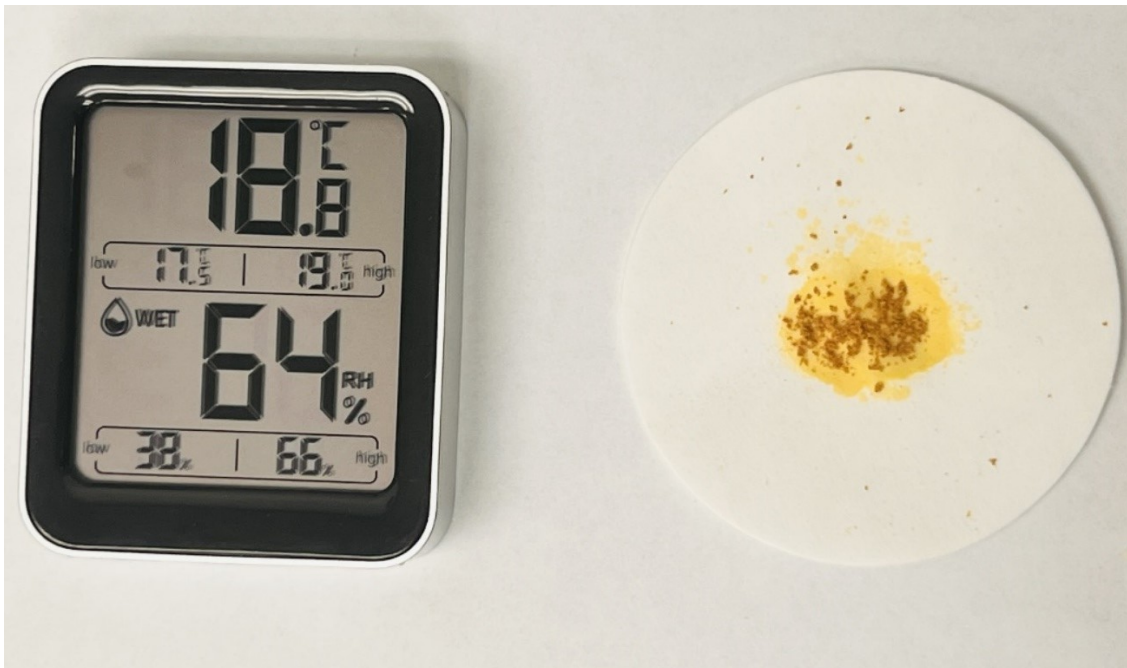

**Fig. S30. Stability test:** TNMT-K sample stored at 38-64% humidity for 24 hours (see FTIR, Fig. S12).

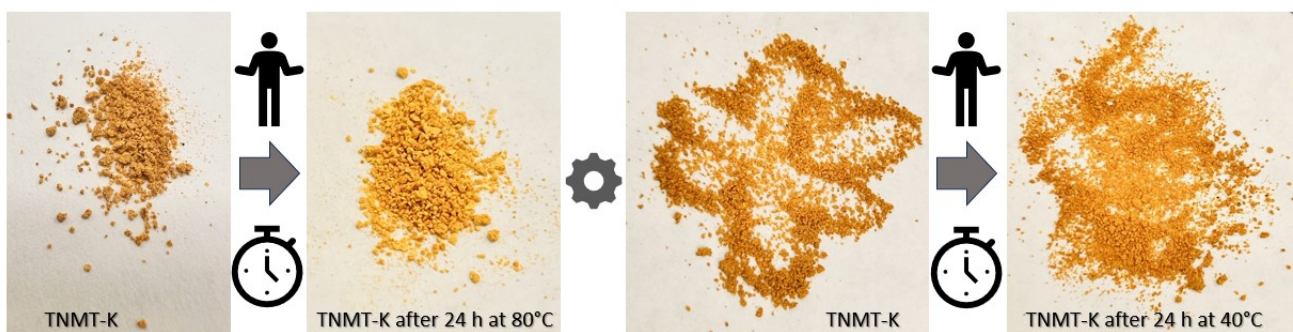

**Fig. S31. Stability test** (i) TNMT-K sample stored at 80 °C and (ii) TNMT-K sample stored at 40 °C (see FTIR, Figs. S13-S16).

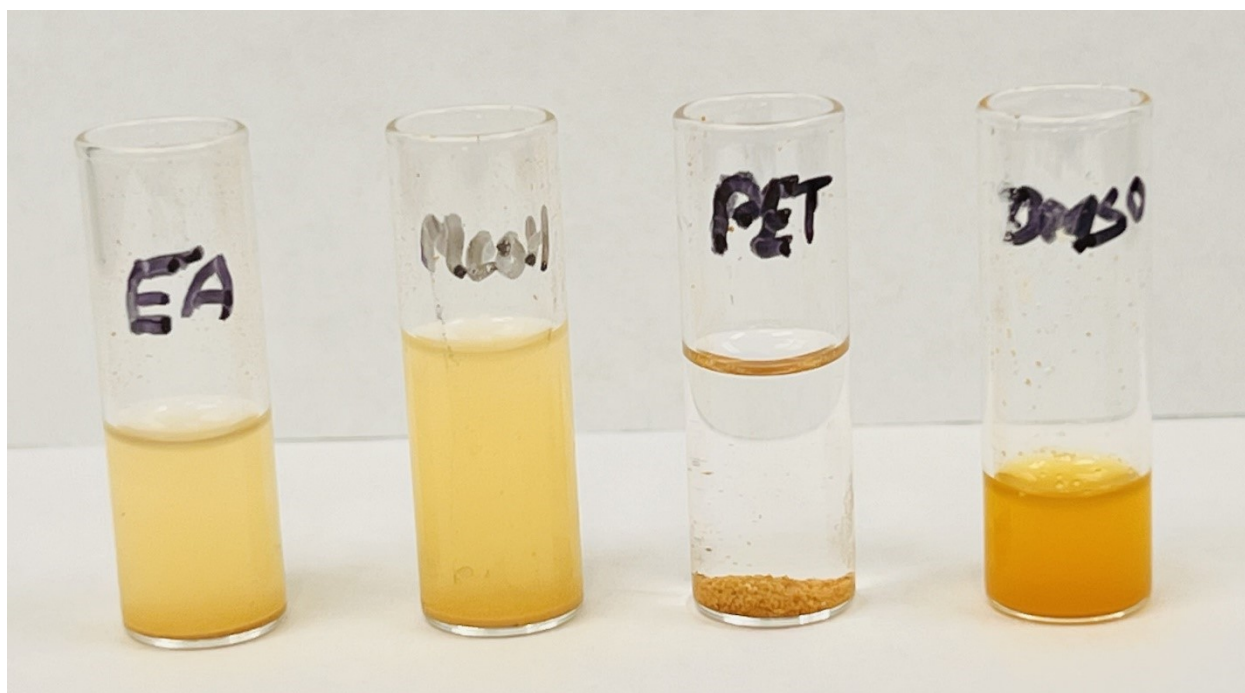

**Fig. S32.** TNMT-K sample stored in different solvents for 24 hours: (i) ethyl acetate, (ii) methanol, (iii) petroleum ether, and (iv) dimethyl sulfoxide at room temperature (stable in all solvents).

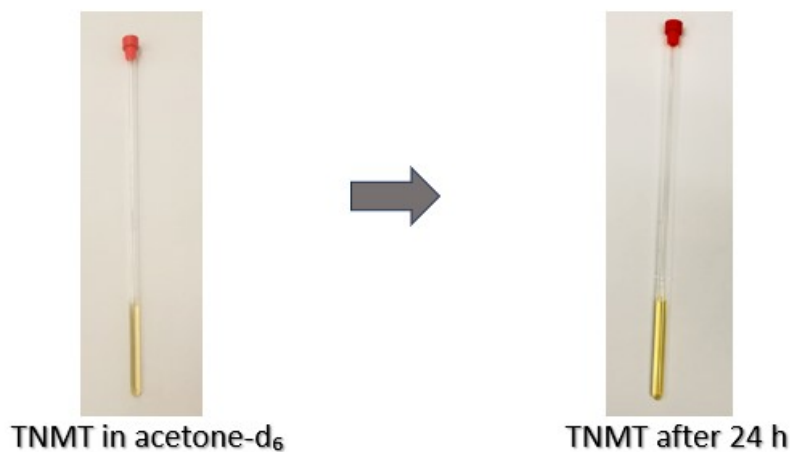

**Fig. S33. Stability test:** TNMT (2) sample dissolved in acetone-d<sub>6</sub> and stored for 24 hours at room temperature (stable).

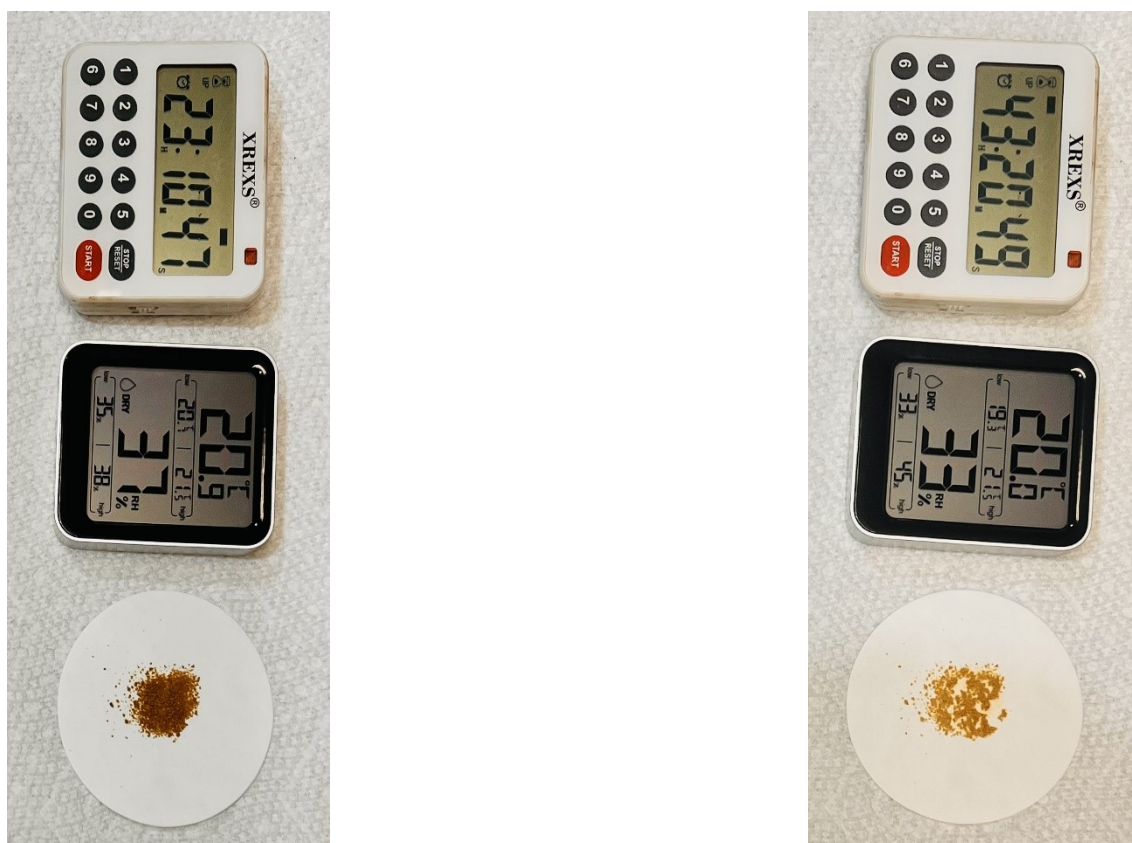

**Fig. S34. Stability test:** TNMT-K sample stored at room temperature under 25-38% humidity (i) TNMT-K after 23 hours and (ii) TNMT-K after 43 hours (see FTIR, **Figs S9-S11**).

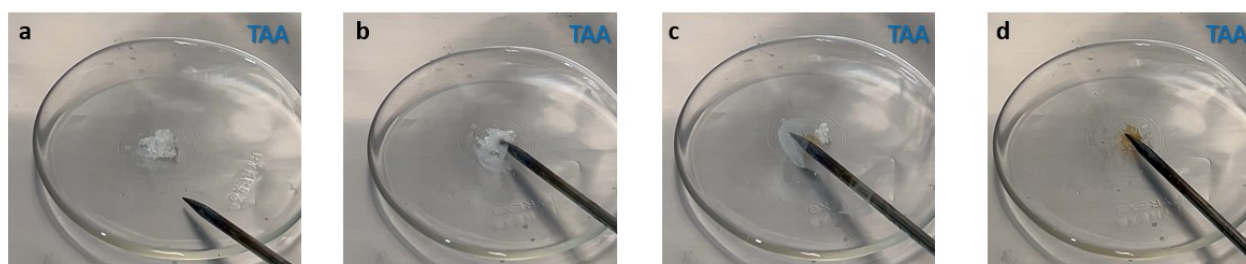

**Fig. S35. Hot-needle test for TAA (1):** White fume

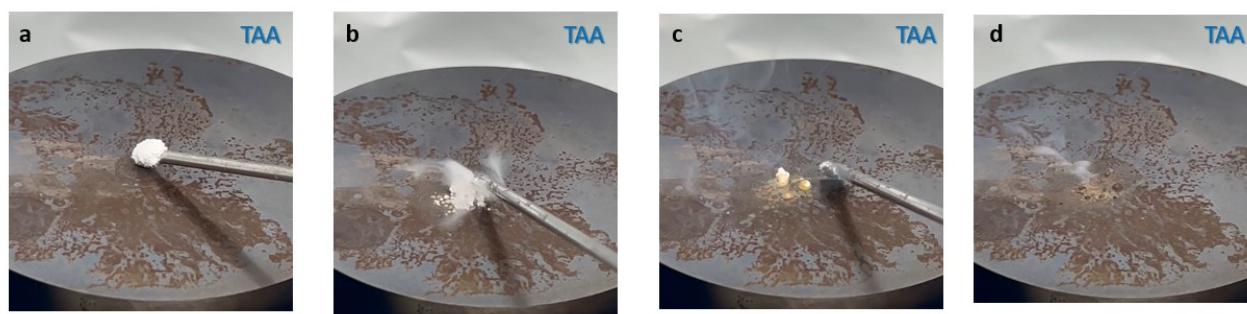

**Fig. S36.** Hot-plate test for TAA (1): White fume

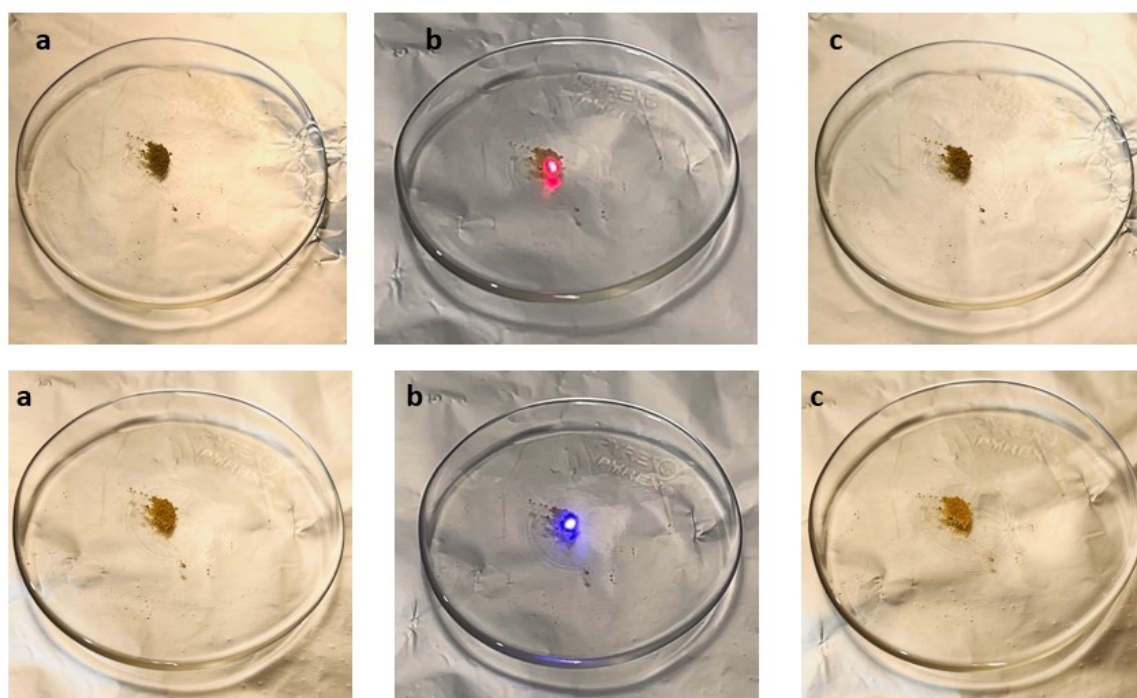

**Fig. S37.** Laser irradiation test: TNMT-K was exposed to laser light (red 650 nm) and blue (450 nm)-(a) beginning, (b) laser irradiation, (c) after.

**Table S8.** Detonation parameters of TNMT-K

|                                  |   |                              |
|----------------------------------|---|------------------------------|
| Heat of detonation               | = | -5039.4 kJ/kg                |
| Detonation temperature           | = | 3828.576 K                   |
| Detonation pressure              | = | 26.27235 GPa                 |
| Detonation velocity              | = | 7862.806 m/s                 |
| Particle velocity                | = | 1713.504 m/s                 |
| Sound velocity                   | = | 6149.303 m/s                 |
| Exponent 'Gamma'                 | = | 3.588717                     |
| Density of all products          | = | 2.493368 g/cm <sup>3</sup>   |
| Density of gaseous products      | = | 2.288313 g/cm <sup>3</sup>   |
| Specific volume of all products  | = | 0.401064 cm <sup>3</sup> /g  |
| Specific volume of gaseous prod. | = | 0.4370032 cm <sup>3</sup> /g |
| Volume of gas at STP             | = | 497.889 dm <sup>3</sup> /kg  |
| Moles of gaseous products        | = | 22.213 mol/kg                |

|                                    |   |                                                  |
|------------------------------------|---|--------------------------------------------------|
| Moles of condensed products        | = | 1.944 mol/kg                                     |
| Mean molecular mass of gas. prod.  | = | 32.92023 g/mol                                   |
| Mean molecular mass of cond. prod. | = | 138.025 g/mol                                    |
| Mean molecular mass of all prod.   | = | 41.37924 g/mol                                   |
| Entropy of products                | = | 5.6867 kJ/kg K                                   |
| Internal energy of products        | = | 6507.458 kJ/kg, i.e. 2.68954 kJ/cm <sup>3</sup>  |
| Compression energy                 | = | 1468.058 kJ/kg, i.e. 2.862714 kJ/cm <sup>3</sup> |
| TNT equivalent from Qd             | = | 115.52 %                                         |
| TNT equivalent from pCJ            | = | 141.56 %                                         |

**Table S9.** Concentration of detonation products of TNMT-K

| PRODUCT                            |   | mol/mol exp. | mol/kg expl. | Mol %   | Mass %  |
|------------------------------------|---|--------------|--------------|---------|---------|
| N <sub>2</sub>                     | = | 3.333448E+00 | 1.296204E+01 | 53.6563 | 36.3106 |
| CO <sub>2</sub>                    | = | 1.491089E+00 | 5.798066E+00 | 24.0011 | 25.5173 |
| O <sub>2</sub>                     | = | 5.436759E-01 | 2.114072E+00 | 8.7512  | 6.7648  |
| K <sub>2</sub> CO <sub>3</sub> (s) | = | 5.000000E-01 | 1.944239E+00 | 8.0482  | 26.8354 |
| NO                                 | = | 2.604502E-01 | 1.012755E+00 | 4.1923  | 3.0389  |
| NO <sub>2</sub>                    | = | 5.824693E-02 | 2.264919E-01 | 0.9376  | 1.0420  |
| NO <sub>3</sub>                    | = | 1.392327E-02 | 5.414035E-02 | 0.2241  | 0.3357  |
| CO                                 | = | 8.910457E-03 | 3.464812E-02 | 0.1434  | 0.0970  |
| O                                  | = | 2.606202E-03 | 1.013416E-02 | 0.0420  | 0.0162  |
| N <sub>2</sub> O                   | = | 2.392372E-04 | 9.302687E-04 | 0.0039  | 0.0041  |
| N                                  | = | 3.842376E-06 | 1.494100E-05 | 0.0001  | 0.0000  |
| CNO                                | = | 7.365906E-07 | 2.864217E-06 | 0.0000  | 0.0000  |
| KO                                 | = | 2.468737E-11 | 9.599630E-11 | 0.0000  | 0.0000  |
| KO <sub>2</sub> (l)                | = | 5.254700E-22 | 2.043279E-21 | 0.0000  | 0.0000  |
| K <sub>2</sub> CO <sub>3</sub> (l) | = | 4.531573E-22 | 1.762092E-21 | 0.0000  | 0.0000  |
| KO <sub>2</sub> (s)                | = | 2.171050E-22 | 8.442083E-22 | 0.0000  | 0.0000  |

**Table S10.** Thermodynamic properties of combustion products of TNMT-K

| PARAMETER                     |   | CHAMBER | THROAT  | EXIT (Pc/Pe) |
|-------------------------------|---|---------|---------|--------------|
| Pressure (MPa)                | = | 7.000   | 3.887   | 0.1000       |
| Pressure ratio (Pc/P)         | = | 1.000   | 1.801   | 70.000       |
| Temperature (K)               | = | 3086.0  | 2905.6  | 2114.0       |
| Enthalpy (kJ/kg)              | = | 567.5   | 172.5   | -1747.7      |
| Internal energy (kJ/kg)       | = | -134.1  | -481.5  | -2191.7      |
| Entropy (kJ/K kg)             | = | 7.495   | 7.495   | 7.495        |
| Qp (kJ/kg)                    | = | -3201.8 | -3358.2 | -4460.6      |
| Mol gas (mol/kg expl.)        | = | 27.135  | 26.832  | 24.047       |
| Mol tot. (mol/kg expl.)       | = | 27.344  | 27.075  | 25.261       |
| V (dm <sup>3</sup> /kg expl.) | = | 608.2   | 601.4   | 539.0        |
| Mass gas (g/kg expl.)         | = | 971.15  | 966.35  | 832.20       |

|                                         |   |        |         |        |
|-----------------------------------------|---|--------|---------|--------|
| Mass cond. (g/kg expl.)                 | = | 28.79  | 33.58   | 167.55 |
| Mw mean (g)                             | = | 36.569 | 36.931  | 39.577 |
| Density, all prod. (kg/m <sup>3</sup> ) | = | 10.052 | 5.996   | 0.237  |
| Density, gas prod. (kg/m <sup>3</sup> ) | = | 9.764  | 5.795   | 0.197  |
| R (J/kg K)                              | = | 225.60 | 223.08  | 199.93 |
| Cp (J/kgK)                              | = | 1258.7 | 1231.3  | 1276.8 |
| Cv (J/kgK)                              | = | 1033.1 | 1008.2  | 1076.9 |
| Cp/Cv                                   | = | 1.218  | 1.221   | 1.186  |
| Sonic velocity (m/s)                    | = | 921.0  | 889.7   | 718.5  |
| Mach number (m/s)                       | = |        | 0.999   | 2.995  |
| Flow velocity (m/s)                     | = |        | 888.8   | 2151.8 |
| Mass flux (kg/m <sup>2</sup> s)         | = |        | 5328.99 | 508.99 |

**Table S11.** Performance parameters of TNMT-K

| PARAMETER                           |   | THROAT | EXIT (Pc/Pe) |
|-------------------------------------|---|--------|--------------|
| Pressure ratio (Pc/P)               | = | 1.801  | 70.000       |
| Area ratio (Ae/At)                  | = | 1.000  | 10.470       |
| Characteristic vel. (m/s)           | = | 1313.6 | 1313.6       |
| Exhaust velocity (m/s)              | = | 888.8  | 2151.8       |
| Thrust coefficient                  | = | 0.677  | 1.638        |
| Specific impulse, Isp (s)           | = | 90.64  | 219.43       |
| Vacuum spec. impulse (s)            | = | 163.58 | 239.07       |
| Isp * rho (g/cm <sup>3</sup> s)     | = | 176.74 | 427.88       |
| Ivacuum * rho (g/cm <sup>3</sup> s) | = | 318.98 | 466.19       |

NOTE: Specific impulse at Pc=7.0 MPa, and Pc/Pe=70.00 equals 219.426 (s)

**Table S12.** Concentration of combustion products (mol/kg of explosive) of TNMT-K.

| PRODUCT                            |   | CHAMBER     | THROAT      | EXIT (Pc/Pe) |
|------------------------------------|---|-------------|-------------|--------------|
| CN <sub>2</sub>                    | = | 4.65629E-12 | 5.97624E-13 | 7.29711E-19  |
| CNO                                | = | 2.74838E-07 | 7.54423E-08 | 1.29059E-11  |
| CO                                 | = | 1.24228E+00 | 9.04533E-01 | 7.12133E-02  |
| CO <sub>2</sub>                    | = | 6.32608E+00 | 6.62911E+00 | 6.49181E+00  |
| K <sub>2</sub>                     | = | 1.80624E-01 | 1.65500E-01 | 2.69391E-02  |
| K <sub>2</sub> CO <sub>3</sub> (l) | = | 1.38529E-03 | 2.43308E-01 | 1.21393E+00  |
| K <sub>2</sub> CO <sub>3</sub> (s) | = | 2.07186E-01 | 2.21057E-19 | 6.90008E-06  |
| K <sub>2</sub> O                   | = | 4.78396E-01 | 5.33477E-01 | 3.42742E-01  |
| K <sub>2</sub> O(l)                | = | 0.00000E+00 | 0.00000E+00 | 0.00000E+00  |
| K <sub>2</sub> O(s)                | = | 0.00000E+00 | 0.00000E+00 | 1.00051E-22  |
| K <sub>2</sub> O <sub>2</sub>      | = | 1.18713E-02 | 1.25756E-02 | 7.09320E-03  |

|                                   |   |             |             |             |
|-----------------------------------|---|-------------|-------------|-------------|
| K <sub>2</sub> O <sub>2</sub> (l) | = | 0.00000E+00 | 0.00000E+00 | 0.00000E+00 |
| K <sub>2</sub> O <sub>2</sub> (s) | = | 0.00000E+00 | 0.00000E+00 | 0.00000E+00 |
| KCN                               | = | 2.05816E-05 | 7.75559E-06 | 4.90457E-09 |
| KO                                | = | 2.12953E+00 | 1.97875E+00 | 7.07056E-01 |
| KO <sub>2</sub> (l)               | = | 3.00014E-20 | 1.57183E-20 | 2.88790E-22 |
| KO <sub>2</sub> (s)               | = | 5.12560E-21 | 3.09398E-21 | 2.11408E-22 |
| N                                 | = | 5.23267E-05 | 2.17774E-05 | 7.48215E-08 |
| N <sub>2</sub>                    | = | 1.32667E+01 | 1.33360E+01 | 1.35406E+01 |
| NO                                | = | 6.84195E-01 | 5.46316E-01 | 1.38070E-01 |
| NO <sub>2</sub>                   | = | 1.60572E-03 | 1.09196E-03 | 1.15323E-04 |
| O                                 | = | 1.36423E-01 | 9.68575E-02 | 1.09693E-02 |
| O <sub>2</sub>                    | = | 2.67760E+00 | 2.62773E+00 | 2.71049E+00 |

---

## References

1. M. J. Frisch, G. W. Trucks, H. B. Schlegel, G. E. Scuseria, M. A. Robb, J. R. Cheeseman, G. Scalmani, V. Barone, B. Mennucci, G. A. Petersson, H. Nakatsuji, M. Caricato, X. Li, H. P. Hratchian, A. F. Izmaylov, J. Bloino, G. Zheng, J. L. Sonnenberg, M. Hada, M. Ehara, K. Toyota, R. Fukuda, J. Hasegawa, M. Ishida, T. Nakajima, Y. Honda, O. Kitao, H. Nakai, T. Vreven, J. A. Montgomery Jr., J. E. Peralta, F. Ogliaro, M. Bearpark, J. J. Heyd, E. Brothers, K. N. Kudin, V. N. Staroverov, R. Kobayashi, J. Normand, K. Raghavachari, A. Rendell, J. C. Burant, S. S. Iyengar, J. Tomasi, M. Cossi, N. Rega, N. J. Millam, M. Klene, J. E. Knox, J. B. Cross, V. Bakken, C. Adamo, J. Jaramillo, R. Gomperts, R. E. Stratmann, O. Yazyev, A. J. Austin, R. Cammi, C. Pomelli, J. W. Ochterski, R. L. Martin, K. Morokuma, V. G. Zakrzewski, G. A. Voth, P. Salvador, J. J. Dannenberg, S. Dapprich, A. D. Daniels, ö. Farkas, J. B. Foresman, J. V. Ortiz, J. Cioslowski and D. J. Fox, Gaussian 03, Revision D.01, Gaussian Inc., Wallingford CT, 2003.
2. P. W. Atkins, Physical Chemistry, Oxford University press: Oxford 1982.
3. M. S. Westwell, M. S. Searle, D. J. Wales, D. H. Williams, *J. Am. Chem. Soc.*, 1995, **117**, 5013-5015
4. H. Gao, C. Ye, C. M. Piekarski, J. M. Shreeve, *J. Phys. Chem., C* 2007, **111**, 10718–10731.
5. M. Suceška, EXPLO5, version 7.01, Brodarski Institute, Zagreb, Croatia, 2013.
6. O. V. Dolomanov, L. J. Bourhis, R. J. Gildea, J. A. K. Howard, H. Puschmann, *J. Appl. Crystallogr.*, 2009, **42**, 339-341.
7. G. M. Sheldrick, *Acta Crystallogr. Sect. A Found. Adv.*, 2015, **C71**, 3-8.

8. G. M. Sheldrick, *Acta Cryst.*, 2008, **A64**, 112-122.
9. G. M. Sheldrick, *Acta Cryst.*, 2015, **A71**, 3-8.
10. V. Grakauskas, A. H. J. Albert, *Heterocycl. Chem.*, 1981, **18**, 1477-1479.
11. R. Haiges, K. O. Christe, *Inorg. Chem.*, 2013, **52**, 7249-7260.
